# Supplementary material for: Novel, in-natural-infection subdominant HIV-1 CD8+ T-cell epitopes revealed in human recipients of conserved-region T-cell vaccines
Source: PubMed Central journal article supplement (PMC5407754; doi:10.1371/journal.pone.0176418), 2017-04-27
Supplement: pone.0176418.s005.pdf [file pone.0176418.s005.pdf]

A

**HC080 GFRKYTAFTIPSINN (Pol)**  
 VID 411 - A\*02:01 (A02) A\*02:01 (A02) B\*08:01 (B08) B\*51:01 (B07) C\*03:03 C\*07:01  
**TAFTIPSI** Predicted B\*51:01 and C\*03:03, reported A\*02:01 and B\*51:01  
**YTAFTIPSI** Predicted A\*02:01 and B\*51:01, reported A\*02:01  
**KYTAFTIPSI** Predicted C\*07:01, reported A2

B

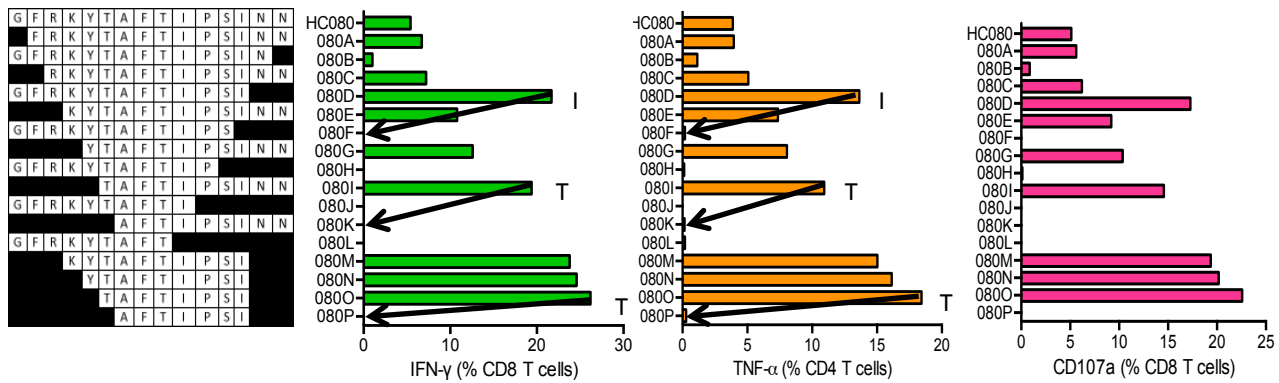

C

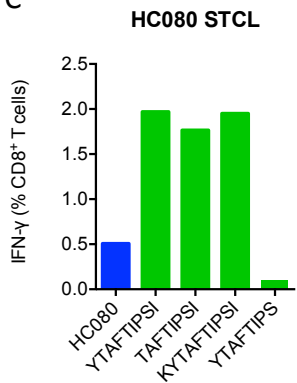

D

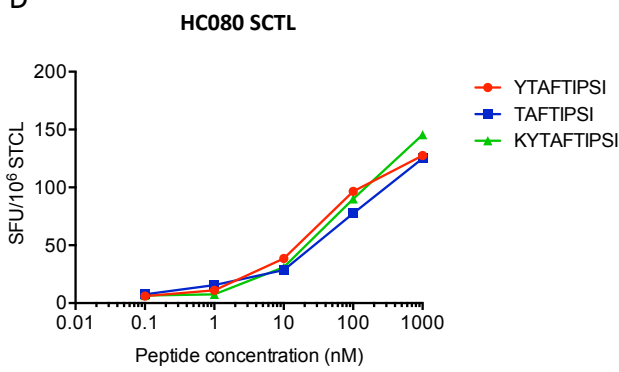

**S5 Fig. HC080 GFRKYTAFTIPSINN (Pol) - Definition of CD8<sup>+</sup> T-cell determinants.** (A) The box. 15-mer peptide HC080 was recognized by volunteer 411 of the indicated HLA type. Optimal peptides are listed below. Cryopreserved 411 lymphocytes were expanded by stimulation with 'parental' 15-mer peptide for 10 days to establish STCL effector cells. These were subjected to ICS using serially truncated (B), and overlapping 9-mer or 8-mer (C) peptides monitoring IFN- $\gamma$  (green) and TNF- $\alpha$  (orange) production and surface expression of CD107a (pink). In (B), arrows next to an amino acid indicate the peptide-terminal amino acid residue required for efficient peptide recognition. (D) Three strong stimulatory peptides were subjected to titration against the HC080-expanded SCTL.
