# Supplementary material for: Novel, in-natural-infection subdominant HIV-1 CD8+ T-cell epitopes revealed in human recipients of conserved-region T-cell vaccines
Source: PubMed Central journal article supplement (PMC5407754; doi:10.1371/journal.pone.0176418), 2017-04-27
Supplement: pone.0176418.s012.pdf [file pone.0176418.s012.pdf]

A

**HC093 KNPEIYIQYMDDLIV (Pol)** (K added for solubility)  
 VID 417 - A\*03:01 (A03) A\*30:04 (A01) B\*35:01 (B07) B\*50:01 (B44) C\*04:01 C\*06:02  
 Overlapping epitopes

B

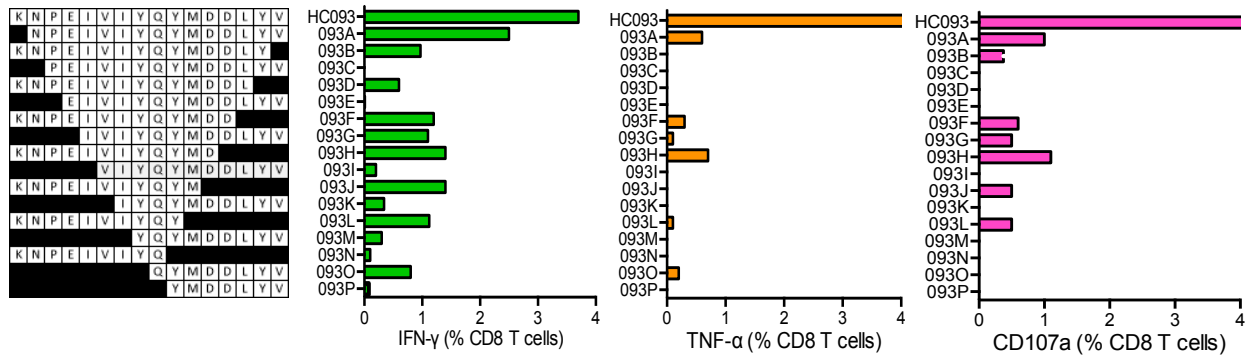

**S12 Fig. HC093 KNPEIYIQYMDDLIV (Pol) - Definition of CD8<sup>+</sup> T-cell determinants.** (A) The box. Peptide HC093 was recognized by volunteer 417 of the shown HLA type (HLA-A\*02:01-negative). (B) Cryopreserved lymphocytes were expanded with peptide HC093 for 10 days to establish STCL effector cells, which were subjected to ICS using serially truncated peptides monitoring IFN- $\gamma$  (green) and TNF- $\alpha$  (orange) production and surface expression of CD107a (pink).
