# Supplementary material for: Novel, in-natural-infection subdominant HIV-1 CD8+ T-cell epitopes revealed in human recipients of conserved-region T-cell vaccines
Source: PubMed Central journal article supplement (PMC5407754; doi:10.1371/journal.pone.0176418), 2017-04-27
Supplement: pone.0176418.s020.pdf [file pone.0176418.s020.pdf]

**S1 Table. List of studied vaccine recipients and their HLA class I alleles and supertypes.**

| VID | HLA-A <sup>a</sup> |                  | HLA-B <sup>a</sup> |               | HLA-C <sup>a</sup> |         |
|-----|--------------------|------------------|--------------------|---------------|--------------------|---------|
| 403 | A*01:01 (A01)      | A*30:01 (A01/03) | B*13:02 (UC)       | B*39:01 (B27) | C*06:02            | C*07:01 |
| 404 | A*68:01 (A03)      | A*68:01 (A03)    | B*44:02 (B44)      | B*51:01 (B07) | C*07:04            | C*14:02 |
| 406 | A*03:01 (A03)      | A*31:01 (A03)    | B*40:01 (B44)      | B*44:03 (B44) | C*03:04            | C*04:01 |
| 409 | A*01:01 (A01)      | A*03:01 (A03)    | B*07:02 (B07)      | B*08:01 (B08) | C*07:01            | C*07:02 |
| 410 | A*30:02 (A01)      | A*30:02 (A01)    | B*18:01 (B27)      | B*57:03 (B58) | C*07:01            | C*18:01 |
| 411 | A*02:01 (A02)      | A*02:01 (A02)    | B*08:01 (B08)      | B*51:01 (B07) | C*03:03            | C*07:01 |
| 413 | A*01:01 (A01)      | A*03:01 (A03)    | B*08:01 (B08)      | B*44:02 (B44) | C*05:01            | C*07:01 |
| 415 | A*02:01 (A02)      | A*03:01 (A03)    | B*07:02 (B07)      | B*44:02 (B44) | C*07:02            | C*07:02 |
| 416 | A*02:01 (A02)      | A*02:01 (A02)    | B*08:01 (B08)      | B*44:02 (B44) | C*05:01            | C*07:01 |
| 417 | A*03:01 (A03)      | A*30:04 (A01)    | B*35:01 (B07)      | B*50:01 (B44) | C*04:01            | C*06:02 |
| 418 | A*02:01 (A02)      | A*24:02 (A24)    | B*07:02 (B07)      | B*27:05 (B27) | C*01:02            | C*07:02 |
| 421 | A*02:01 (A02)      | A*11:01 (A03)    | B*35:03 (B07)      | B*40:02 (B44) | C*02:02            | C*12:03 |

a – HLA types are given as the allele names, and for HLA-A and -B alleles followed by its HLA supertype in brackets. UC – unclassified.
