# Supplementary material for: Novel, in-natural-infection subdominant HIV-1 CD8+ T-cell epitopes revealed in human recipients of conserved-region T-cell vaccines
Source: PubMed Central journal article supplement (PMC5407754; doi:10.1371/journal.pone.0176418), 2017-04-27
Supplement: pone.0176418.s021.pdf [file pone.0176418.s021.pdf]

**S2 Table. Parental 15-mer peptides and responders used in the mapping studies**

| Peptide | Sequence                  | Protein/Regions  | HXB2 aa Positions    | Responders         |
|---------|---------------------------|------------------|----------------------|--------------------|
| HC031   | CTERQANFLGKIWPS           | Gag/p2p7p1p6     | 426-440/63-77        | 421                |
| HC049   | <b>KN</b> FPISPIETVPVKLK  | Pol/Protease, RT | 153-168/97-99, 1-13  | 406                |
| HC050   | SPIETVPVKLKP GMD          | Pol/RT           | 158-172/3-17         | 406                |
| HC078   | YFSVPLDEGFRKYTA           | Pol/RT           | 270-284/115-129      | 417, 421           |
| HC079   | PLDEGFRKYTAFTIP           | Pol/RT           | 274-288/119-133      | 417                |
| HC080   | GFRKYTAFTIPSINN           | Pol/RT           | 278-292/123-137      | 411                |
| HC081   | YTAFTIPSINNETPG           | Pol/RT           | 282-296/127-141      | 415                |
| HC088   | GSPAIFQSSMTKILE           | Pol/RT           | 310-324/155-169      | 409, 421           |
| HC091   | ILEPFRAQNPEIVYI           | Pol/RT           | 322-336/167-181      | 410                |
| HC092   | FRAQNPEIVYQYMD <b>DKK</b> | Pol/RT           | 326-342/171-187      | 410                |
| HC093   | <b>KN</b> PEIVYQYMD DLYV  | Pol/RT           | 329-344/174-189      | 411, 415, 416, 418 |
| HC102   | <b>KQVDRMR</b> IRTWKSLVK  | Vif              | 11-26                | 403                |
| HC103   | <b>MR</b> IRTWKSLVKHHLT   | Vif              | 16-30                | 418                |
| HC135   | KLVSQGIRKVLFLDG           | Pol/RNase, Int   | 705-719/110-120, 1-4 | 416, 418           |
| HC139   | DKAQAKEIVASCDKC           | Pol/Integrase    | 744-758/29-43        | 404                |
| HC145   | GQVDCSPGIWQLDCTH          | Pol/Integrase    | 767-782/52-67        | 404                |
| HC164   | VQMAVFIHNFKRKGGI          | Pol/Integrase    | 891-906/176-191      | 404, 410           |
| HC176   | VVPRRKAKIIRDY GK          | Pol/Integrase    | 974-988/259-273      | 413                |

For some peptides, terminal lysine(s), shown in bold, were added to improve solubility  
RT- reverse transcriptase
