# Supplementary material for: Novel, in-natural-infection subdominant HIV-1 CD8+ T-cell epitopes revealed in human recipients of conserved-region T-cell vaccines
Source: PubMed Central journal article supplement (PMC5407754; doi:10.1371/journal.pone.0176418), 2017-04-27
Supplement: pone.0176418.s022.pdf [file pone.0176418.s022.pdf]

### S3 Table. Epitope prediction

Volunteer ID: 403

HLA-A\*01:01, HLA-A\*30:01, HLA-B\*13:02, HLA-B\*39:01

| AA                                                                                                    | Length (aa) | Peptide                                                      | HLA         | 1-log50k (aff) | Affinity (nM) | % Rank | Label           | Estimated Accuracy |
|-------------------------------------------------------------------------------------------------------|-------------|--------------------------------------------------------------|-------------|----------------|---------------|--------|-----------------|--------------------|
| <b>Peptide Sequence: KQVDRMRIRTWKS<del>L</del>VK HC102</b>                                            |             |                                                              |             |                |               |        |                 |                    |
| 7                                                                                                     | 10          | RIRTWKS <del>L</del> VK                                      | HLA-A*30:01 | 0.891          | 3             | 0.03   | Strong binder   | 0.853              |
| 5                                                                                                     | 8           | RMRIRTWK                                                     | HLA-A*30:01 | 0.913          | 3             | 0.01   | Strong binder   | 0.853              |
| 5                                                                                                     | 11          | RMRIRTWKS <del>L</del> V                                     | HLA-A*30:01 | 0.845          | 5             | 0.1    | Strong binder   | 0.853              |
| 7                                                                                                     | 9           | RIRTWKS <del>L</del> V                                       | HLA-A*30:01 | 0.827          | 7             | 0.12   | Strong binder   | 0.853              |
| 9                                                                                                     | 8           | RTWKS <del>L</del> VK                                        | HLA-A*30:01 | 0.794          | 9             | 0.25   | Strong binder   | 0.853              |
| 5                                                                                                     | 10          | RMRIRTWKS <del>L</del>                                       | HLA-A*30:01 | 0.786          | 10            | 0.25   | Strong binder   | 0.853              |
| 7                                                                                                     | 8           | RIRTWKS <del>L</del>                                         | HLA-A*30:01 | 0.753          | 14            | 0.4    | Strong binder   | 0.853              |
| 5                                                                                                     | 9           | RMRIRTWKS                                                    | HLA-A*30:01 | 0.718          | 21            | 0.8    | Weak binder     | 0.853              |
| 1                                                                                                     | 9           | KQVDRMRIR                                                    | HLA-A*30:01 | 0.473          | 300           | 5.0    | Combined binder | 0.853              |
| 3                                                                                                     | 10          | VDRMRIRTWK                                                   | HLA-A*30:01 | 0.42           | 530           | 6.0    | Non-binder      | 0.853              |
| 2                                                                                                     | 11          | QVDRMRIRTWK                                                  | HLA-A*30:01 | 0.419          | 538           | 6.0    | Non-binder      | 0.853              |
| 1                                                                                                     | 8           | KQVDRMRI                                                     | HLA-A*30:01 | 0.37           | 914           | 8.0    | Non-binder      | 0.853              |
| 1                                                                                                     | 8           | KQVDRMRI                                                     | HLA-B*13:02 | 0.098          | NA            | 3.0    | Non-binder      | 0.600              |
| 6                                                                                                     | 9           | MRIRTWKS <del>L</del>                                        | HLA-B*39:01 | 0.675          | 34            | 0.4    | Strong binder   | 0.853              |
| 4                                                                                                     | 11          | DRMRIRTWKS <del>L</del>                                      | HLA-B*39:01 | 0.553          | 126           | 1.5    | Weak binder     | 0.853              |
| 6                                                                                                     | 10          | MRIRTWKS <del>L</del> V                                      | HLA-B*39:01 | 0.458          | 354           | 3.0    | Combined binder | 0.853              |
| <b>Peptide Sequence: MRIRTWKS<del>L</del>VKH<del>L</del>T HC103</b>                                   |             |                                                              |             |                |               |        |                 |                    |
| 2                                                                                                     | 10          | RIRTWKS <del>L</del> VK                                      | HLA-A*30:01 | 0.891          | 3             | 0.03   | Strong binder   | 0.853              |
| 2                                                                                                     | 9           | RIRTWKS <del>L</del> V                                       | HLA-A*30:01 | 0.827          | 7             | 0.12   | Strong binder   | 0.853              |
| 4                                                                                                     | 8           | RTWKS <del>L</del> VK                                        | HLA-A*30:01 | 0.794          | 9             | 0.25   | Strong binder   | 0.853              |
| 2                                                                                                     | 8           | RIRTWKS <del>L</del>                                         | HLA-A*30:01 | 0.753          | 14            | 0.4    | Strong binder   | 0.853              |
| 2                                                                                                     | 11          | RIRTWKS <del>L</del> VKH                                     | HLA-A*30:01 | 0.665          | 38            | 1.0    | Weak binder     | 0.853              |
| 4                                                                                                     | 11          | RTWKS <del>L</del> VKH <del>L</del>                          | HLA-A*30:01 | 0.623          | 59            | 1.5    | Weak binder     | 0.853              |
| 7                                                                                                     | 8           | KSLVKH <del>L</del>                                          | HLA-A*30:01 | 0.586          | 88            | 2.0    | Weak binder     | 0.853              |
| 7                                                                                                     | 9           | KSLVKH <del>L</del> T                                        | HLA-A*30:01 | 0.517          | 187           | 4.0    | Combined binder | 0.853              |
| 4                                                                                                     | 10          | RTWKS <del>L</del> VKH <del>H</del>                          | HLA-A*30:01 | 0.421          | 524           | 6.0    | Non-binder      | 0.853              |
| 4                                                                                                     | 9           | RTWKS <del>L</del> VKH                                       | HLA-A*30:01 | 0.399          | 664           | 7.0    | Non-binder      | 0.853              |
| 5                                                                                                     | 10          | TWKS <del>L</del> VKH <del>L</del>                           | HLA-A*30:01 | 0.391          | 725           | 7.0    | Non-binder      | 0.853              |
| 1                                                                                                     | 9           | MRIRTWKS <del>L</del>                                        | HLA-B*39:01 | 0.675          | 34            | 0.4    | Strong binder   | 0.853              |
| 6                                                                                                     | 9           | WKS <del>L</del> VKH <del>L</del>                            | HLA-B*39:01 | 0.53           | 161           | 1.5    | Weak binder     | 0.853              |
| 1                                                                                                     | 10          | MRIRTWKS <del>L</del> V                                      | HLA-B*39:01 | 0.458          | 354           | 3.0    | Combined binder | 0.853              |
| <b>Peptide Sequence: IIRDY<del>G</del>KQ<del>M</del>A<del>G</del>A<del>D</del>C<del>V</del> HC178</b> |             |                                                              |             |                |               |        |                 |                    |
| 1                                                                                                     | 10          | IIRDY <del>G</del> KQ <del>M</del> A                         | HLA-A*30:01 | 0.428          | 488           | 6.0    | Combined binder | 0.853              |
| 1                                                                                                     | 9           | IIRDY <del>G</del> KQ <del>M</del>                           | HLA-A*30:01 | 0.372          | 895           | 8.0    | Non-binder      | 0.853              |
| 7                                                                                                     | 9           | KQ <del>M</del> A <del>G</del> A <del>D</del> C <del>V</del> | HLA-B*13:02 | 0.163          | NA            | 0.8    | Weak binder     | 0.600              |
| 2                                                                                                     | 8           | IRDY <del>G</del> KQ <del>M</del>                            | HLA-B*39:01 | 0.378          | 833           | 4.0    | Non-binder      | 0.853              |

Volunteer ID: 404

HLA-A\*68:01, HLA-B\*44:02, HLA-B\*51:01, HLA-C\*07:04, HLA-C14:02

| Pos                                                                             | Length (aa) | Peptide               | HLA         | 1-log50k (aff) | Affinity (nM) | % Rank | Label           | Estimated Accuracy |
|---------------------------------------------------------------------------------|-------------|-----------------------|-------------|----------------|---------------|--------|-----------------|--------------------|
| <b>Peptide Sequence: KLVSQ<del>G</del>IRK<del>V</del>LF<del>L</del>DG HC135</b> |             |                       |             |                |               |        |                 |                    |
| 2                                                                               | 8           | LVSQ <del>G</del> IRK | HLA-A*68:01 | 0.452          | 376           | 4.0    | Combined binder | 0.853              |

| Pos                                             | Length (aa) | Peptide     | HLA         | 1-log50k (aff) | Affinity (nM) | % Rank | Label           | Estimated Accuracy |
|-------------------------------------------------|-------------|-------------|-------------|----------------|---------------|--------|-----------------|--------------------|
| 4                                               | 10          | SQGIRKVLFL  | HLA-C*07:04 | 0.087          | NA            | 4.0    | Non-binder      | 0.503              |
| <b>Peptide Sequence: DKAQAKEIVASCDKC HC139</b>  |             |             |             |                |               |        |                 |                    |
| 7                                               | 8           | EIVASCDK    | HLA-A*68:01 | 0.566          | 109           | 2.0    | Weak binder     | 0.853              |
| 4                                               | 11          | QAKEIVASCDK | HLA-A*68:01 | 0.413          | 574           | 4.0    | Non-binder      | 0.853              |
| 6                                               | 10          | KEIVASCDKC  | HLA-B*44:02 | 0.235          | 3943          | 4.0    | Non-binder      | 0.853              |
| 6                                               | 9           | KEIVASCDK   | HLA-B*44:02 | 0.208          | 5282          | 4.0    | Non-binder      | 0.853              |
| <b>Peptide Sequence: GQVDCSPGIWQLDCTH HC145</b> |             |             |             |                |               |        |                 |                    |
| 1                                               | 10          | GQVDCSPGIW  | HLA-B*44:02 | 0.256          | 3126          | 3.0    | Non-binder      | 0.853              |
| 5                                               | 8           | CSPGIWQL    | HLA-C*14:02 | 0.376          | 853           | 9.0    | Non-binder      | 0.853              |
| <b>Peptide Sequence: VQMAVFIHNFKRKGGI HC164</b> |             |             |             |                |               |        |                 |                    |
| 3                                               | 9           | MAVFIHNFK   | HLA-A*68:01 | 0.888          | 3             | 0.01   | Strong binder   | 0.853              |
| 3                                               | 10          | MAVFIHNFKR  | HLA-A*68:01 | 0.861          | 5             | 0.03   | Strong binder   | 0.853              |
| 4                                               | 9           | AVFIHNFKR   | HLA-A*68:01 | 0.746          | 16            | 0.3    | Strong binder   | 0.853              |
| 4                                               | 8           | AVFIHNFK    | HLA-A*68:01 | 0.722          | 20            | 0.5    | Strong binder   | 0.853              |
| 3                                               | 11          | MAVFIHNFKRK | HLA-A*68:01 | 0.722          | 20            | 0.5    | Strong binder   | 0.853              |
| 2                                               | 10          | QMAVFIHNFK  | HLA-A*68:01 | 0.718          | 21            | 0.5    | Strong binder   | 0.853              |
| 2                                               | 11          | QMAVFIHNFKR | HLA-A*68:01 | 0.67           | 35            | 0.8    | Weak binder     | 0.853              |
| 5                                               | 8           | VFIHNFKR    | HLA-A*68:01 | 0.503          | 217           | 3.0    | Combined binder | 0.853              |
| 4                                               | 10          | AVFIHNFKRK  | HLA-A*68:01 | 0.499          | 225           | 3.0    | Combined binder | 0.853              |
| 6                                               | 8           | FIHNFKRK    | HLA-A*68:01 | 0.474          | 297           | 3.0    | Combined binder | 0.853              |
| 1                                               | 11          | VQMAVFIHNFK | HLA-A*68:01 | 0.467          | 319           | 3.0    | Combined binder | 0.853              |
| 3                                               | 8           | MAVFIHNF    | HLA-A*68:01 | 0.372          | 890           | 5.0    | Non-binder      | 0.853              |
| 1                                               | 10          | VQMAVFIHNF  | HLA-B*44:02 | 0.337          | 1306          | 1.5    | Weak binder     | 0.853              |
| 3                                               | 8           | MAVFIHNF    | HLA-B*51:01 | 0.24           | NA            | 2.0    | Weak binder     | 0.853              |
| 1                                               | 10          | VQMAVFIHNF  | HLA-C*07:04 | 0.115          | NA            | 2.0    | Weak binder     | 0.503              |
| 1                                               | 10          | VQMAVFIHNF  | HLA-C*14:02 | 0.549          | 132           | 3.0    | Combined binder | 0.853              |
| 2                                               | 9           | QMAVFIHNF   | HLA-C*14:02 | 0.442          | 421           | 6.0    | Combined binder | 0.853              |
| 3                                               | 8           | MAVFIHNF    | HLA-C*14:02 | 0.398          | 673           | 7.0    | Non-binder      | 0.853              |

**Volunteer ID: 406**

**HLA-A\*03:01, HLA-A\*31:01, HLA-B\*40:01, HLA-B\*44:03, HLA-C\*03:04, HLA-C\*04:01**

| Pos                                             | Length (aa) | Peptide     | HLA         | 1-log50k (aff) | Affinity (nM) | % Rank | Label           | Estimated Accuracy |
|-------------------------------------------------|-------------|-------------|-------------|----------------|---------------|--------|-----------------|--------------------|
| <b>Peptide Sequence: KNFPISPIETVPVKLK HC049</b> |             |             |             |                |               |        |                 |                    |
| 4                                               | 11          | PISPIETVPVK | HLA-A*03:01 | 0.252          | 3260          | 4.0    | Non-binder      | 0.853              |
| 8                                               | 8           | IETVPVKL    | HLA-B*40:01 | 0.585          | 89            | 1.0    | Weak binder     | 0.853              |
| 8                                               | 8           | IETVPVKL    | HLA-B*44:03 | 0.369          | 923           | 1.5    | Weak binder     | 0.853              |
| 3                                               | 11          | FPISPIETVPV | HLA-C*03:04 | 0.545          | 138           | 1.5    | Weak binder     | 0.694              |
| 5                                               | 9           | ISPIETVPV   | HLA-C*03:04 | 0.532          | 158           | 2.0    | Weak binder     | 0.694              |
| 5                                               | 11          | ISPIETVPVKL | HLA-C*03:04 | 0.439          | 433           | 5.0    | Combined binder | 0.694              |
| 6                                               | 8           | SPIETVPV    | HLA-C*03:04 | 0.417          | 548           | 6.0    | Non-binder      | 0.694              |
| 3                                               | 9           | FPISPIETV   | HLA-C*03:04 | 0.411          | 587           | 6.0    | Non-binder      | 0.694              |
| 1                                               | 8           | KNFPISPI    | HLA-C*03:04 | 0.404          | 629           | 7.0    | Non-binder      | 0.694              |
| 6                                               | 10          | SPIETVPVKL  | HLA-C*03:04 | 0.367          | 944           | 9.0    | Non-binder      | 0.694              |

| Pos                                            | Length (aa) | Peptide     | HLA         | 1-log50k (aff) | Affinity (nM) | % Rank | Label           | Estimated Accuracy |
|------------------------------------------------|-------------|-------------|-------------|----------------|---------------|--------|-----------------|--------------------|
| 5                                              | 9           | ISPIETVPV   | HLA-C*04:01 | 0.138          | NA            | 1.5    | Weak binder     | 0.762              |
| 5                                              | 11          | ISPIETVPVKL | HLA-C*04:01 | 0.123          | NA            | 2.0    | Weak binder     | 0.762              |
| 2                                              | 10          | NFPISPIETV  | HLA-C*04:01 | 0.085          | NA            | 4.0    | Non-binder      | 0.762              |
| <b>Peptide Sequence: SPIETVPVKLPGMD HC050</b>  |             |             |             |                |               |        |                 |                    |
| 3                                              | 8           | IETVPVKL    | HLA-B*40:01 | 0.585          | 89            | 1.0    | Weak binder     | 0.853              |
| 3                                              | 8           | IETVPVKL    | HLA-B*44:03 | 0.369          | 923           | 1.5    | Weak binder     | 0.853              |
| 1                                              | 8           | SPIETVPV    | HLA-C*03:04 | 0.417          | 548           | 6.0    | Non-binder      | 0.694              |
| 1                                              | 10          | SPIETVPVKL  | HLA-C*03:04 | 0.367          | 944           | 9.0    | Non-binder      | 0.694              |
| <b>Peptide Sequence: MRIRTWKSLVKHHLT HC103</b> |             |             |             |                |               |        |                 |                    |
| 4                                              | 8           | RTWKSLVK    | HLA-A*03:01 | 0.702          | 25            | 0.08   | Strong binder   | 0.853              |
| 2                                              | 10          | RIRTWKSLVK  | HLA-A*03:01 | 0.642          | 48            | 0.17   | Strong binder   | 0.853              |
| 4                                              | 9           | RTWKSLVKH   | HLA-A*03:01 | 0.39           | 738           | 2.0    | Weak binder     | 0.853              |
| 2                                              | 11          | RIRTWKSLVKH | HLA-A*03:01 | 0.339          | 1279          | 3.0    | Non-binder      | 0.853              |
| 4                                              | 10          | RTWKSLVKHH  | HLA-A*03:01 | 0.322          | 1527          | 3.0    | Non-binder      | 0.853              |
| 4                                              | 8           | RTWKSLVK    | HLA-A*31:01 | 0.641          | 48            | 0.8    | Weak binder     | 0.853              |
| 2                                              | 10          | RIRTWKSLVK  | HLA-A*31:01 | 0.568          | 108           | 1.5    | Weak binder     | 0.853              |
| 4                                              | 9           | RTWKSLVKH   | HLA-A*31:01 | 0.382          | 803           | 4.0    | Non-binder      | 0.853              |
| 4                                              | 11          | RTWKSLVKHHL | HLA-A*31:01 | 0.373          | 887           | 4.0    | Non-binder      | 0.853              |
| 4                                              | 11          | RTWKSLVKHHL | HLA-C*03:04 | 0.473          | 300           | 4.0    | Combined binder | 0.694              |
| 7                                              | 8           | KSLVKHHL    | HLA-C*03:04 | 0.397          | 680           | 7.0    | Non-binder      | 0.694              |

**Volunteer ID: 409**

**HLA-A\*01:01, HLA-A\*03:01, HLA-B\*07:02, HLA-B\*08:01, HLA-C\*07:01, HLA-C\*07:02**

| Pos                                            | Length (aa) | Peptide     | HLA         | 1-log50k (aff) | Affinity (nM) | % Rank | Label         | Estimated Accuracy |
|------------------------------------------------|-------------|-------------|-------------|----------------|---------------|--------|---------------|--------------------|
| <b>Peptide Sequence: GSPAIFQSSMTKILE HC088</b> |             |             |             |                |               |        |               |                    |
| 4                                              | 9           | AIFQSSMTK   | HLA-A*03:01 | 0.75           | 15            | 0.03   | Strong binder | 0.853              |
| 5                                              | 8           | IFQSSMTK    | HLA-A*03:01 | 0.381          | 809           | 2.0    | Weak binder   | 0.853              |
| 2                                              | 9           | SPAIFQSSM   | HLA-B*07:02 | 0.799          | 9             | 0.08   | Strong binder | 0.853              |
| 2                                              | 10          | SPAIFQSSMT  | HLA-B*07:02 | 0.394          | 701           | 2.0    | Weak binder   | 0.853              |
| 2                                              | 8           | SPAIFQSS    | HLA-B*07:02 | 0.33           | 1402          | 3.0    | Non-binder    | 0.853              |
| 2                                              | 9           | SPAIFQSSM   | HLA-B*08:01 | 0.313          | 1698          | 4.0    | Non-binder    | 0.853              |
| <b>Peptide Sequence: MRIRTWKSLVKHHLT HC103</b> |             |             |             |                |               |        |               |                    |
| 4                                              | 8           | RTWKSLVK    | HLA-A*03:01 | 0.702          | 25            | 0.08   | Strong binder | 0.853              |
| 2                                              | 10          | RIRTWKSLVK  | HLA-A*03:01 | 0.642          | 48            | 0.17   | Strong binder | 0.853              |
| 4                                              | 9           | RTWKSLVKH   | HLA-A*03:01 | 0.39           | 738           | 2.0    | Weak binder   | 0.853              |
| 2                                              | 11          | RIRTWKSLVKH | HLA-A*03:01 | 0.339          | 1279          | 3.0    | Non-binder    | 0.853              |
| 4                                              | 10          | RTWKSLVKHH  | HLA-A*03:01 | 0.322          | 1527          | 3.0    | Non-binder    | 0.853              |
| 2                                              | 8           | RIRTWKSL    | HLA-B*07:02 | 0.572          | 103           | 0.8    | Weak binder   | 0.853              |
| 4                                              | 11          | RTWKSLVKHHL | HLA-B*07:02 | 0.279          | 2450          | 4.0    | Non-binder    | 0.853              |
| 1                                              | 9           | MRIRTWKSL   | HLA-B*07:02 | 0.276          | 2527          | 4.0    | Non-binder    | 0.853              |
| 2                                              | 8           | RIRTWKSL    | HLA-B*08:01 | 0.52           | 181           | 0.8    | Weak binder   | 0.853              |
| 1                                              | 9           | MRIRTWKSL   | HLA-B*08:01 | 0.433          | 459           | 1.5    | Weak binder   | 0.853              |
| 2                                              | 9           | RIRTWKSLV   | HLA-B*08:01 | 0.356          | 1059          | 3.0    | Non-binder    | 0.853              |
| 4                                              | 11          | RTWKSLVKHHL | HLA-C*07:01 | 0.182          | NA            | 1.0    | Weak binder   | 0.556              |

| Pos                                             | Length (aa) | Peptide     | HLA         | 1-log50k (aff) | Affinity (nM) | % Rank | Label       | Estimated Accuracy |
|-------------------------------------------------|-------------|-------------|-------------|----------------|---------------|--------|-------------|--------------------|
| 1                                               | 9           | MRIRTWKSL   | HLA-C*07:01 | 0.121          | NA            | 3.0    | Non-binder  | 0.556              |
| 4                                               | 11          | RTWKSLVKHHL | HLA-C*07:02 | 0.171          | NA            | 3.0    | Non-binder  | 0.541              |
| <b>Peptide Sequence: RKAKIIRDYDGKQMAG HC177</b> |             |             |             |                |               |        |             |                    |
| 4                                               | 8           | KIIRDYGK    | HLA-A*03:01 | 0.519          | 183           | 0.8    | Weak binder | 0.853              |
| 2                                               | 10          | KAKIIRDYGK  | HLA-A*03:01 | 0.309          | 1768          | 3.0    | Non-binder  | 0.853              |
| 5                                               | 9           | IIRDYGKQM   | HLA-B*07:02 | 0.321          | 1551          | 3.0    | Non-binder  | 0.853              |

**Volunteer ID: 410**

**HLA-A\*30:02, HLA-B\*18:01, HLA-B\*57:02, HLA-C\*07:01, HLA-C\*18:01**

| Pos                                              | Length (aa) | Peptide     | HLA         | 1-log50k (aff) | Affinity (nM) | % Rank | Label           | Estimated Accuracy |
|--------------------------------------------------|-------------|-------------|-------------|----------------|---------------|--------|-----------------|--------------------|
| <b>Peptide Sequence: ILEPFRAQNPEIVIY HC091</b>   |             |             |             |                |               |        |                 |                    |
| 7                                                | 9           | AQNPEIVIY   | HLA-A*30:02 | 0.598          | 77            | 1.0    | Weak binder     | 0.853              |
| 6                                                | 10          | RAQNPEIVIY  | HLA-A*30:02 | 0.562          | 114           | 1.5    | Weak binder     | 0.853              |
| 6                                                | 9           | RAQNPEIVI   | HLA-B*57:02 | 0.23           | NA            | 2.0    | Weak binder     | 0.739              |
| 6                                                | 9           | RAQNPEIVI   | HLA-C*07:01 | 0.137          | NA            | 3.0    | Non-binder      | 0.556              |
| 5                                                | 10          | FRAQNPEIVI  | HLA-C*07:01 | 0.108          | NA            | 4.0    | Non-binder      | 0.556              |
| 5                                                | 10          | FRAQNPEIVI  | HLA-C*18:01 | 0.077          | NA            | 4.0    | Non-binder      | 0.733              |
| 5                                                | 9           | FRAQNPEIV   | HLA-C*18:01 | 0.077          | NA            | 4.0    | Non-binder      | 0.733              |
| 5                                                | 8           | FRAQNPEI    | HLA-C*18:01 | 0.076          | NA            | 4.0    | Non-binder      | 0.733              |
| <b>Peptide Sequence: FRAQNPEIVIYQYMDKK HC092</b> |             |             |             |                |               |        |                 |                    |
| 3                                                | 11          | AQNPEIVIYQY | HLA-A*30:02 | 0.665          | 37            | 0.8    | Weak binder     | 0.853              |
| 3                                                | 9           | AQNPEIVIY   | HLA-A*30:02 | 0.598          | 77            | 1.0    | Weak binder     | 0.853              |
| 2                                                | 10          | RAQNPEIVIY  | HLA-A*30:02 | 0.562          | 114           | 1.5    | Weak binder     | 0.853              |
| 6                                                | 8           | PEIVIYQY    | HLA-B*18:01 | 0.546          | 136           | 0.8    | Weak binder     | 0.853              |
| 5                                                | 9           | NPEIVIYQY   | HLA-B*18:01 | 0.515          | 189           | 0.8    | Weak binder     | 0.853              |
| 6                                                | 9           | PEIVIYQYM   | HLA-B*18:01 | 0.35           | 1138          | 3.0    | Non-binder      | 0.853              |
| 2                                                | 9           | RAQNPEIVI   | HLA-B*57:02 | 0.23           | NA            | 2.0    | Weak binder     | 0.739              |
| 2                                                | 9           | RAQNPEIVI   | HLA-C*07:01 | 0.137          | NA            | 3.0    | Non-binder      | 0.556              |
| 1                                                | 10          | FRAQNPEIVI  | HLA-C*07:01 | 0.108          | NA            | 4.0    | Non-binder      | 0.556              |
| 1                                                | 10          | FRAQNPEIVI  | HLA-C*18:01 | 0.077          | NA            | 4.0    | Non-binder      | 0.733              |
| 1                                                | 9           | FRAQNPEIV   | HLA-C*18:01 | 0.077          | NA            | 4.0    | Non-binder      | 0.733              |
| 1                                                | 8           | FRAQNPEI    | HLA-C*18:01 | 0.076          | NA            | 4.0    | Non-binder      | 0.733              |
| <b>Peptide Sequence: KNPEIVIYQYMDLLYV HC093</b>  |             |             |             |                |               |        |                 |                    |
| 5                                                | 11          | IVIYQYMDLLY | HLA-A*30:02 | 0.693          | 28            | 0.5    | Strong binder   | 0.853              |
| 6                                                | 10          | VIYQYMDLLY  | HLA-A*30:02 | 0.686          | 30            | 0.5    | Strong binder   | 0.853              |
| 8                                                | 8           | YQYMDLLY    | HLA-A*30:02 | 0.679          | 32            | 0.8    | Weak binder     | 0.853              |
| 7                                                | 9           | IYQYMDLLY   | HLA-A*30:02 | 0.539          | 147           | 1.5    | Weak binder     | 0.853              |
| 1                                                | 10          | KNPEIVIYQY  | HLA-A*30:02 | 0.45           | 383           | 3.0    | Combined binder | 0.853              |
| 1                                                | 8           | KNPEIVIY    | HLA-A*30:02 | 0.376          | 858           | 4.0    | Non-binder      | 0.853              |
| 3                                                | 8           | PEIVIYQY    | HLA-B*18:01 | 0.546          | 136           | 0.8    | Weak binder     | 0.853              |
| 2                                                | 9           | NPEIVIYQY   | HLA-B*18:01 | 0.515          | 189           | 0.8    | Weak binder     | 0.853              |
| 8                                                | 8           | YQYMDLLY    | HLA-B*18:01 | 0.368          | 933           | 2.0    | Weak binder     | 0.853              |
| 3                                                | 9           | PEIVIYQYM   | HLA-B*18:01 | 0.35           | 1138          | 3.0    | Non-binder      | 0.853              |

| Pos                                             | Length (aa) | Peptide     | HLA         | 1-log50k (aff) | Affinity (nM) | % Rank | Label         | Estimated Accuracy |
|-------------------------------------------------|-------------|-------------|-------------|----------------|---------------|--------|---------------|--------------------|
| 8                                               | 9           | YQYMDDLIV   | HLA-C*07:01 | 0.135          | NA            | 3.0    | Non-binder    | 0.556              |
| 9                                               | 8           | QYMDDLIV    | HLA-C*18:01 | 0.148          | NA            | 0.5    | Strong binder | 0.733              |
| 7                                               | 10          | IYQYMDDLIV  | HLA-C*18:01 | 0.136          | NA            | 0.8    | Weak binder   | 0.733              |
| 8                                               | 9           | YQYMDDLIV   | HLA-C*18:01 | 0.088          | NA            | 3.0    | Non-binder    | 0.733              |
| 7                                               | 8           | IYQYMDDL    | HLA-C*18:01 | 0.084          | NA            | 3.0    | Non-binder    | 0.733              |
| 1                                               | 11          | KNPEIVIQYM  | HLA-C*18:01 | 0.081          | NA            | 3.0    | Non-binder    | 0.733              |
| <b>Peptide Sequence: VQMAVFIHNFKRKGGI HC164</b> |             |             |             |                |               |        |               |                    |
| 2                                               | 9           | QMAVFIHNF   | HLA-A*30:02 | 0.403          | 638           | 3.0    | Non-binder    | 0.853              |
| 1                                               | 10          | VQMAVFIHNF  | HLA-A*30:02 | 0.402          | 644           | 3.0    | Non-binder    | 0.853              |
| 1                                               | 11          | VQMAVFIHNFK | HLA-A*30:02 | 0.351          | 1117          | 4.0    | Non-binder    | 0.853              |
| 1                                               | 10          | VQMAVFIHNF  | HLA-B*18:01 | 0.39           | 738           | 2.0    | Weak binder   | 0.853              |
| 3                                               | 8           | MAVFIHNF    | HLA-B*18:01 | 0.324          | 1509          | 3.0    | Non-binder    | 0.853              |
| 3                                               | 8           | MAVFIHNF    | HLA-B*57:02 | 0.292          | NA            | 0.8    | Weak binder   | 0.739              |
| 2                                               | 9           | QMAVFIHNF   | HLA-B*57:02 | 0.156          | NA            | 4.0    | Non-binder    | 0.739              |
| 1                                               | 10          | VQMAVFIHNF  | HLA-C*07:01 | 0.179          | NA            | 1.0    | Weak binder   | 0.556              |
| 3                                               | 8           | MAVFIHNF    | HLA-C*07:01 | 0.114          | NA            | 4.0    | Non-binder    | 0.556              |
| 1                                               | 10          | VQMAVFIHNF  | HLA-C*18:01 | 0.079          | NA            | 4.0    | Non-binder    | 0.733              |

**Volunteer ID: 411**

**HLA-A\*02:01, HLA-B\*08:01, HLA-B\*51:01, HLA-C\*03:03, HLA-C\*07:01**

| Pos                                            | Length (aa) | Peptide     | HLA         | 1-log50k (aff) | Affinity (nM) | % Rank | Label           | Estimated Accuracy |
|------------------------------------------------|-------------|-------------|-------------|----------------|---------------|--------|-----------------|--------------------|
| <b>Peptide Sequence: GFRKYTAFTIPSINN HC080</b> |             |             |             |                |               |        |                 |                    |
| 5                                              | 9           | YTAFTIPSI   | HLA-A*02:01 | 0.611          | 68            | 2.0    | Weak binder     | 0.853              |
| 1                                              | 8           | GFRKYTAF    | HLA-B*08:01 | 0.35           | 1139          | 3.0    | Non-binder      | 0.853              |
| 2                                              | 9           | FRKYTAFTI   | HLA-B*08:01 | 0.313          | 1689          | 4.0    | Non-binder      | 0.853              |
| 6                                              | 8           | TAFTIPSI    | HLA-B*51:01 | 0.345          | NA            | 0.8    | Weak binder     | 0.853              |
| 5                                              | 9           | YTAFTIPSI   | HLA-B*51:01 | 0.206          | NA            | 3.0    | Non-binder      | 0.853              |
| 6                                              | 8           | TAFTIPSI    | HLA-C*03:03 | 0.433          | 459           | 5.0    | Combined binder | 0.694              |
| 5                                              | 9           | YTAFTIPSI   | HLA-C*03:03 | 0.522          | 176           | 2.0    | Weak binder     | 0.694              |
| 3                                              | 8           | RKYTAFTI    | HLA-C*07:01 | 0.17           | NA            | 1.5    | Weak binder     | 0.556              |
| 3                                              | 11          | RKYTAFTIPSI | HLA-C*07:01 | 0.155          | NA            | 1.5    | Weak binder     | 0.556              |
| 4                                              | 10          | KYTAFTIPSI  | HLA-C*07:01 | 0.13           | NA            | 3.0    | Non-binder      | 0.556              |
| <b>Peptide Sequence: GSPAIFQSSMTKILE HC088</b> |             |             |             |                |               |        |                 |                    |
| 6                                              | 8           | FQSSMTKI    | HLA-A*02:01 | 0.443          | 412           | 4.0    | Combined binder | 0.853              |
| 4                                              | 10          | AIFQSSMTKI  | HLA-A*02:01 | 0.398          | 671           | 5.0    | Non-binder      | 0.853              |
| 2                                              | 9           | SPAIFQSSM   | HLA-B*08:01 | 0.313          | 1698          | 4.0    | Non-binder      | 0.853              |
| 2                                              | 9           | SPAIFQSSM   | HLA-B*51:01 | 0.268          | NA            | 1.5    | Weak binder     | 0.853              |
| 6                                              | 8           | FQSSMTKI    | HLA-B*51:01 | 0.198          | NA            | 3.0    | Non-binder      | 0.853              |
| 4                                              | 10          | AIFQSSMTKI  | HLA-C*03:03 | 0.472          | 304           | 4.0    | Combined binder | 0.694              |
| 4                                              | 11          | AIFQSSMTKIL | HLA-C*03:03 | 0.439          | 432           | 5.0    | Combined binder | 0.694              |

| Pos                                            | Length (aa) | Peptide     | HLA         | 1-log50k (aff) | Affinity (nM) | % Rank | Label           | Estimated Accuracy |
|------------------------------------------------|-------------|-------------|-------------|----------------|---------------|--------|-----------------|--------------------|
| 6                                              | 9           | FQSSMTKIL   | HLA-C*03:03 | 0.403          | 638           | 7.0    | Non-binder      | 0.694              |
| 6                                              | 8           | FQSSMTKI    | HLA-C*03:03 | 0.392          | 720           | 7.0    | Non-binder      | 0.694              |
| <b>Peptide Sequence: KNPEIVIQYMDDLIV HC093</b> |             |             |             |                |               |        |                 |                    |
| 8                                              | 9           | YQYMDDLIV   | HLA-A*02:01 | 0.788          | 10            | 0.4    | Strong binder   | 0.853              |
| 6                                              | 11          | VIYQYMDDLIV | HLA-A*02:01 | 0.682          | 31            | 1.0    | Weak binder     | 0.853              |
| 2                                              | 10          | NPEIVIQYM   | HLA-B*51:01 | 0.242          | NA            | 2.0    | Weak binder     | 0.853              |
| 2                                              | 9           | NPEIVIQY    | HLA-B*51:01 | 0.164          | NA            | 4.0    | Non-binder      | 0.853              |
| 8                                              | 9           | YQYMDDLIV   | HLA-C*03:03 | 0.484          | 266           | 4.0    | Combined binder | 0.694              |
| 6                                              | 11          | VIYQYMDDLIV | HLA-C*03:03 | 0.395          | 697           | 7.0    | Non-binder      | 0.694              |
| 8                                              | 9           | YQYMDDLIV   | HLA-C*07:01 | 0.135          | NA            | 3.0    | Non-binder      | 0.556              |
| <b>Peptide Sequence: PEWEFVNTPLVKLW HC117</b>  |             |             |             |                |               |        |                 |                    |
| 5                                              | 8           | FVNTPLV     | HLA-A*02:01 | 0.663          | 38            | 1.5    | Weak binder     | 0.853              |
| 5                                              | 10          | FVNTPLVKL   | HLA-A*02:01 | 0.408          | 604           | 5.0    | Non-binder      | 0.853              |
| 8                                              | 8           | TPPLVKLW    | HLA-B*51:01 | 0.238          | NA            | 2.0    | Weak binder     | 0.853              |
| 5                                              | 11          | FVNTPLVKLW  | HLA-B*51:01 | 0.167          | NA            | 4.0    | Non-binder      | 0.853              |
| 5                                              | 10          | FVNTPLVKL   | HLA-C*03:03 | 0.568          | 108           | 1.5    | Weak binder     | 0.694              |
| 5                                              | 8           | FVNTPLV     | HLA-C*03:03 | 0.565          | 111           | 1.5    | Weak binder     | 0.694              |
| 3                                              | 9           | WEFVNTPL    | HLA-C*07:01 | 0.272          | NA            | 0.12   | Strong binder   | 0.556              |
| 3                                              | 10          | WEFVNTPLV   | HLA-C*07:01 | 0.122          | NA            | 3.0    | Non-binder      | 0.556              |
| <b>Peptide Sequence: LLRAIEAQQHLLQLT HC190</b> |             |             |             |                |               |        |                 |                    |
| 1                                              | 11          | LLRAIEAQQHL | HLA-B*08:01 | 0.471          | 307           | 1.0    | Weak binder     | 0.853              |
| 6                                              | 9           | EAQQHLLQL   | HLA-B*08:01 | 0.372          | 892           | 3.0    | Non-binder      | 0.853              |
| 3                                              | 9           | RAIEAQQHL   | HLA-C*03:03 | 0.611          | 67            | 0.8    | Weak binder     | 0.694              |
| 3                                              | 10          | RAIEAQQHLL  | HLA-C*03:03 | 0.589          | 85            | 0.8    | Weak binder     | 0.694              |
| 7                                              | 8           | AQQHLLQL    | HLA-C*03:03 | 0.383          | 790           | 8.0    | Non-binder      | 0.694              |
| 3                                              | 10          | RAIEAQQHLL  | HLA-C*07:01 | 0.173          | NA            | 1.0    | Weak binder     | 0.556              |
| 3                                              | 9           | RAIEAQQHL   | HLA-C*07:01 | 0.147          | NA            | 2.0    | Weak binder     | 0.556              |
| 7                                              | 8           | AQQHLLQL    | HLA-C*07:01 | 0.112          | NA            | 4.0    | Non-binder      | 0.556              |

**Volunteer ID: 413**

**HLA-A\*01:01, HLA-A\*03:01, HLA-B\*08:01, HLA-B\*44:02, HLA-C\*05:01, HLA-C\*07:01**

| Pos                                             | Length (aa) | Peptide     | HLA         | 1-log50k (aff) | Affinity (nM) | % Rank | Label         | Estimated Accuracy |
|-------------------------------------------------|-------------|-------------|-------------|----------------|---------------|--------|---------------|--------------------|
| <b>Peptide Sequence: VQMAVFIHNFKRKGGI HC164</b> |             |             |             |                |               |        |               |                    |
| 4                                               | 8           | AVFIHNFK    | HLA-A*03:01 | 0.713          | 22            | 0.05   | Strong binder | 0.853              |
| 2                                               | 10          | QMAVFIHNFK  | HLA-A*03:01 | 0.623          | 59            | 0.25   | Strong binder | 0.853              |
| 4                                               | 10          | AVFIHNFKRK  | HLA-A*03:01 | 0.601          | 75            | 0.3    | Strong binder | 0.853              |
| 1                                               | 11          | VQMAVFIHNFK | HLA-A*03:01 | 0.598          | 78            | 0.3    | Strong binder | 0.853              |
| 3                                               | 9           | MAVFIHNFK   | HLA-A*03:01 | 0.515          | 191           | 0.8    | Weak binder   | 0.853              |
| 4                                               |             |             |             |                |               |        |               |                    |
| 6                                               | 8           | FIHNFKRK    | HLA-A*03:01 | 0.453          | 372           | 1.5    | Weak binder   | 0.853              |
| 3                                               | 11          | MAVFIHNFKRK | HLA-A*03:01 | 0.37           | 908           | 2.0    | Weak binder   | 0.853              |
| 2                                               | 11          | QMAVFIHNFKR | HLA-A*03:01 | 0.293          | 2100          | 4.0    | Non-binder    | 0.853              |
| 3                                               | 10          | MAVFIHNFKR  | HLA-A*03:01 | 0.252          | 3282          | 4.0    | Non-binder    | 0.853              |
| 9                                               | 8           | NFKRKGGI    | HLA-B*08:01 | 0.476          | 289           | 1.0    | Weak binder   | 0.853              |

| Pos                                            | Length (aa) | Peptide     | HLA         | 1-log50k (aff) | Affinity (nM) | % Rank | Label           | Estimated Accuracy |
|------------------------------------------------|-------------|-------------|-------------|----------------|---------------|--------|-----------------|--------------------|
| 6                                              | 11          | FIHNFKRKGGI | HLA-B*08:01 | 0.304          | 1867          | 4.0    | Non-binder      | 0.853              |
| 1                                              | 10          | VQMAVFIHNF  | HLA-B*44:02 | 0.337          | 1306          | 1.5    | Weak binder     | 0.853              |
| 1                                              | 10          | VQMAVFIHNF  | HLA-C*07:01 | 0.179          | NA            | 1.0    | Weak binder     | 0.556              |
| 3                                              | 8           | MAVFIHNF    | HLA-C*07:01 | 0.114          | NA            | 4.0    | Non-binder      | 0.556              |
| <b>Peptide Sequence: VVPRRKAKIIRDYGK HC176</b> |             |             |             |                |               |        |                 |                    |
| 8                                              | 8           | KIIRDYGK    | HLA-A*03:01 | 0.519          | 183           | 0.8    | Weak binder     | 0.853              |
| 6                                              | 10          | KAKIIRDYGK  | HLA-A*03:01 | 0.309          | 1768          | 3.0    | Non-binder      | 0.853              |
| 2                                              | 9           | VPRRKAKII   | HLA-B*08:01 | 0.537          | 149           | 0.5    | Strong binder   | 0.853              |
| 2                                              | 8           | VPRRKAKI    | HLA-B*08:01 | 0.482          | 273           | 0.8    | Weak binder     | 0.853              |
| <b>Peptide Sequence: IIRDYGKQMGADCV HC178</b>  |             |             |             |                |               |        |                 |                    |
| 1                                              | 10          | IIRDYGKQMA  | HLA-A*30:01 | 0.428          | 488           | 6.0    | Combined binder | 0.853              |
| 1                                              | 9           | IIRDYGKQM   | HLA-A*30:01 | 0.372          | 895           | 8.0    | Non-binder      | 0.853              |
| 7                                              | 9           | KQMGADCV    | HLA-B*13:02 | 0.163          | NA            | 0.8    | Weak binder     | 0.600              |
| 2                                              | 8           | IRDYGKQM    | HLA-B*39:01 | 0.378          | 833           | 4.0    | Non-binder      | 0.853              |

**Volunteer ID: 414**

**HLA-A\*24:02, HLA-A\*33:01, HLA-B\*14:01, HLA-B\*44:02, HLA-C\*05:01, HLA-C\*08:02**

| Pos                                             | Length (aa) | Peptide     | HLA         | 1-log50k (aff) | Affinity (nM) | % Rank | Label         | Estimated Accuracy |
|-------------------------------------------------|-------------|-------------|-------------|----------------|---------------|--------|---------------|--------------------|
| <b>Peptide Sequence: KQYWQATWIPEWFEVN HC115</b> |             |             |             |                |               |        |               |                    |
| 3                                               | 10          | YWQATWIPEW  | HLA-A*24:02 | 0.812          | 8             | 0.08   | Strong binder | 0.853              |
| 7                                               | 8           | TWIPEWFE    | HLA-A*24:02 | 0.77           | 12            | 0.1    | Strong binder | 0.853              |
| 2                                               | 11          | QYWQATWIPEW | HLA-A*24:02 | 0.739          | 17            | 0.15   | Strong binder | 0.853              |
| 2                                               | 8           | QYWQATWI    | HLA-A*24:02 | 0.686          | 30            | 0.3    | Strong binder | 0.853              |
| 7                                               | 9           | TWIPEWFEV   | HLA-A*24:02 | 0.545          | 138           | 1.0    | Weak binder   | 0.853              |
| 4                                               | 11          | WQATWIPEWFE | HLA-A*24:02 | 0.515          | 190           | 1.0    | Weak binder   | 0.853              |
| 2                                               | 9           | QYWQATWIP   | HLA-A*24:02 | 0.42           | 529           | 2.0    | Weak binder   | 0.853              |
| 6                                               | 9           | ATWIPEWFE   | HLA-A*24:02 | 0.401          | 650           | 2.0    | Weak binder   | 0.853              |
| 4                                               | 9           | WQATWIPEW   | HLA-A*24:02 | 0.401          | 650           | 2.0    | Weak binder   | 0.853              |
| 1                                               | 8           | KQYWQATW    | HLA-A*24:02 | 0.362          | 997           | 3.0    | Non-binder    | 0.853              |
| 3                                               | 8           | YWQATWIP    | HLA-A*24:02 | 0.358          | 1041          | 3.0    | Non-binder    | 0.853              |
| 5                                               | 10          | QATWIPEWFE  | HLA-A*24:02 | 0.352          | 1104          | 3.0    | Non-binder    | 0.853              |
| 4                                               | 9           | WQATWIPEW   | HLA-B*44:02 | 0.416          | 556           | 0.8    | Weak binder   | 0.853              |
| 1                                               | 8           | KQYWQATW    | HLA-B*44:02 | 0.353          | 1103          | 1.5    | Weak binder   | 0.853              |
| 4                                               | 11          | WQATWIPEWFE | HLA-B*44:02 | 0.324          | 1498          | 2.0    | Weak binder   | 0.853              |
| 1                                               | 9           | KQYWQATWI   | HLA-B*44:02 | 0.209          | 5203          | 4.0    | Non-binder    | 0.853              |
| <b>Peptide Sequence: LLRAIEAQQHLLQLT HC190</b>  |             |             |             |                |               |        |               |                    |
| 6                                               | 9           | EAQQHLLQL   | HLA-B*14:01 | 0.29           | 2171          | 4.0    | Non-binder    | 0.853              |
| 5                                               | 8           | IEAQQHLL    | HLA-B*44:02 | 0.436          | 449           | 0.8    | Weak binder   | 0.853              |
| 5                                               | 10          | IEAQQHLLQL  | HLA-B*44:02 | 0.429          | 481           | 0.8    | Weak binder   | 0.853              |
| 5                                               | 11          | IEAQQHLLQLT | HLA-B*44:02 | 0.323          | 1524          | 2.0    | Weak binder   | 0.853              |
| 3                                               | 10          | RAIEAQQHLL  | HLA-C*05:01 | 0.364          | 975           | 4.0    | Non-binder    | 0.853              |
| 3                                               | 10          | RAIEAQQHLL  | HLA-C*08:02 | 0.396          | 688           | 3.0    | Non-binder    | 0.797              |

**Volunteer ID: 415****HLA-A\*02:01, HLA-A\*03:01, HLA-B\*07:02, HLA-B\*44:02, HLA-C\*07:02**

| Pos                                            | Length (aa) | Peptide     | HLA         | 1-log <sub>50</sub> k (aff) | Affinity (nM) | % Rank | Label         | Estimated Accuracy |
|------------------------------------------------|-------------|-------------|-------------|-----------------------------|---------------|--------|---------------|--------------------|
| <b>Peptide Sequence: YTAFTIPSI HC081</b>       |             |             |             |                             |               |        |               |                    |
| 1                                              | 9           | YTAFTIPSI   | HLA-A*02:01 | 0.611                       | 68            | 2.0    | Weak binder   | 0.853              |
| 6                                              | 8           | IPSINNET    | HLA-B*07:02 | 0.289                       | 2192          | 4.0    | Non-binder    | 0.853              |
| 1                                              | 9           | YTAFTIPSI   | HLA-C*07:02 | 0.14                        | NA            | 4.0    | Non-binder    | 0.541              |
| <b>Peptide Sequence: KNPEIVYQYMDDLIV HC093</b> |             |             |             |                             |               |        |               |                    |
| 8                                              | 9           | YQYMDDLIV   | HLA-A*02:01 | 0.788                       | 10            | 0.4    | Strong binder | 0.853              |
| 6                                              | 11          | VIYQYMDDLIV | HLA-A*02:01 | 0.682                       | 31            | 1.0    | Weak binder   | 0.853              |
| 6                                              | 10          | VIYQYMDDLIV | HLA-A*03:01 | 0.36                        | 1021          | 3.0    | Non-binder    | 0.853              |
| 5                                              | 11          | IVYQYMDDLIV | HLA-A*03:01 | 0.264                       | 2887          | 4.0    | Non-binder    | 0.853              |
| 2                                              | 10          | NPEIVYQYM   | HLA-B*07:02 | 0.27                        | 2690          | 4.0    | Non-binder    | 0.853              |
| 3                                              | 8           | PEIVYQY     | HLA-B*44:02 | 0.412                       | 582           | 0.8    | Weak binder   | 0.853              |
| 3                                              | 9           | PEIVYQYM    | HLA-B*44:02 | 0.297                       | 2004          | 2.0    | Weak binder   | 0.853              |
| 8                                              | 8           | YQYMDDLIV   | HLA-B*44:02 | 0.239                       | 3759          | 3.0    | Non-binder    | 0.853              |
| 8                                              | 9           | YQYMDDLIV   | HLA-C*07:02 | 0.197                       | NA            | 1.5    | Weak binder   | 0.541              |
| 9                                              | 8           | QYMDDLIV    | HLA-C*07:02 | 0.169                       | NA            | 3.0    | Non-binder    | 0.541              |
| <b>Peptide Sequence: MIVWQVDRMRIRTWK HC101</b> |             |             |             |                             |               |        |               |                    |
| 1                                              | 11          | MIVWQVDRMRI | HLA-A*02:01 | 0.371                       | 902           | 6.0    | Non-binder    | 0.853              |
| 8                                              | 8           | RMRIRTWK    | HLA-A*03:01 | 0.681                       | 31            | 0.1    | Strong binder | 0.853              |
| 5                                              | 11          | QVDRMRIRTWK | HLA-A*03:01 | 0.367                       | 943           | 2.0    | Weak binder   | 0.853              |
| 4                                              | 11          | WQVDRMRIRTW | HLA-B*44:02 | 0.267                       | 2779          | 3.0    | Non-binder    | 0.853              |

**Volunteer ID: 416****HLA-A\*02:01, HLA-B\*08:01, HLA-B\*44:02, HLA-C\*05:01, HLA-C\*07:01**

| Pos                                            | Length (aa) | Peptide     | HLA         | 1-log <sub>50</sub> k (aff) | Affinity (nM) | % Rank | Label           | Estimated Accuracy |
|------------------------------------------------|-------------|-------------|-------------|-----------------------------|---------------|--------|-----------------|--------------------|
| <b>Peptide Sequence: KNPEIVYQYMDDLIV HC093</b> |             |             |             |                             |               |        |                 |                    |
| 8                                              | 9           | YQYMDDLIV   | HLA-A*02:01 | 0.788                       | 10            | 0.4    | Strong binder   | 0.853              |
| 6                                              | 11          | VIYQYMDDLIV | HLA-A*02:01 | 0.682                       | 31            | 1.0    | Weak binder     | 0.853              |
| 3                                              | 8           | PEIVYQY     | HLA-B*44:02 | 0.412                       | 582           | 0.8    | Weak binder     | 0.853              |
| 3                                              | 9           | PEIVYQYM    | HLA-B*44:02 | 0.297                       | 2004          | 2.0    | Weak binder     | 0.853              |
| 8                                              | 8           | YQYMDDLIV   | HLA-B*44:02 | 0.239                       | 3759          | 3.0    | Non-binder      | 0.853              |
| 8                                              | 9           | YQYMDDLIV   | HLA-C*07:01 | 0.135                       | NA            | 3.0    | Non-binder      | 0.556              |
| <b>Peptide Sequence: EQVDKLVSGIRKVL HC134</b>  |             |             |             |                             |               |        |                 |                    |
| 5                                              | 10          | KLVSGIRKVL  | HLA-A*02:01 | 0.506                       | 210           | 3.0    | Combined binder | 0.853              |
| 8                                              | 8           | SQIRKVL     | HLA-B*08:01 | 0.343                       | 1229          | 3.0    | Non-binder      | 0.853              |
| 2                                              | 10          | QVDKLVSGI   | HLA-C*05:01 | 0.452                       | 378           | 2.0    | Weak binder     | 0.853              |
| <b>Peptide Sequence: KLVSGIRKVLFLDG HC135</b>  |             |             |             |                             |               |        |                 |                    |
| 1                                              | 10          | KLVSGIRKVL  | HLA-A*02:01 | 0.506                       | 210           | 3.0    | Combined binder | 0.853              |
| 6                                              | 8           | GIRKVLFL    | HLA-B*08:01 | 0.362                       | 991           | 3.0    | Non-binder      | 0.853              |



| Pos                                            | Length (aa) | Peptide     | HLA         | 1-log <sub>50</sub> k (aff) | Affinity (nM) | % Rank | Label           | Estimated Accuracy |
|------------------------------------------------|-------------|-------------|-------------|-----------------------------|---------------|--------|-----------------|--------------------|
| 4                                              | 10          | SQGIRKVLFL  | HLA-B*08:01 | 0.356                       | 1062          | 3.0    | Non-binder      | 0.853              |
| 5                                              | 9           | QGIRKVLFL   | HLA-B*08:01 | 0.349                       | 1147          | 3.0    | Non-binder      | 0.853              |
| 4                                              | 8           | SQGIRKVL    | HLA-B*08:01 | 0.343                       | 1229          | 3.0    | Non-binder      | 0.853              |
| <b>Peptide Sequence: VHVASGYIEAEVIPA HC151</b> |             |             |             |                             |               |        |                 |                    |
| 7                                              | 9           | YIEAEVIPA   | HLA-A*02:01 | 0.465                       | 328           | 4.0    | Combined binder | 0.853              |
| 2                                              | 11          | HVASGYIEAEV | HLA-A*02:01 | 0.426                       | 498           | 4.0    | Combined binder | 0.853              |
| 3                                              | 10          | VASGYIEAEV  | HLA-A*02:01 | 0.376                       | 853           | 5.0    | Non-binder      | 0.853              |
| 8                                              | 8           | IEAEVIPA    | HLA-B*44:02 | 0.324                       | 1497          | 2.0    | Weak binder     | 0.853              |
| 4                                              | 9           | ASGYIEAEV   | HLA-C*05:01 | 0.347                       | 1169          | 4.0    | Non-binder      | 0.853              |

**Volunteer ID: 417**

**HLA-A\*03:01, HLA-A\*30:04, HLA-B\*35:01, HLA-B\*50:01, HLA-C\*04:01, HLA-C\*06:02**

| Pos                                             | Length (aa) | Peptide      | HLA         | 1-log <sub>50</sub> k (aff) | Affinity (nM) | % Rank | Label         | Estimated Accuracy |
|-------------------------------------------------|-------------|--------------|-------------|-----------------------------|---------------|--------|---------------|--------------------|
| <b>Peptide Sequence: YFSVPLDEGFRKYTA: HC078</b> |             |              |             |                             |               |        |               |                    |
| 3                                               | 11          | SVPLDEGFRKY  | HLA-A*30:04 | 0.354                       | 1085          | 3.0    | Non-binder    | 0.753              |
| 4                                               | 10          | VPLDEGFRKY   | HLA-B*35:01 | 0.644                       | 47            | 0.5    | Strong binder | 0.853              |
| 2                                               | 9           | FSVPLDEGF    | HLA-B*35:01 | 0.406                       | 617           | 3.0    | Non-binder    | 0.853              |
| 1                                               | 10          | YFSVPLDEGF   | HLA-C*04:01 | 0.12                        | NA            | 2.0    | Weak binder   | 0.762              |
| <b>Peptide Sequence: PLDEGFRKYTAFTIP: HC079</b> |             |              |             |                             |               |        |               |                    |
| 5                                               | 8           | GFRKYTAF     | HLA-A*30:04 | 0.338                       | 1291          | 3.0    | Non-binder    | 0.753              |
| 5                                               | 10          | GFRKYTAFTI   | HLA-A*30:04 | 0.315                       | 1652          | 4.0    | Non-binder    | 0.753              |
| 7                                               | 8           | RKYTAFTI     | HLA-B*50:01 | 0.393                       | 714           | 2.0    | Weak binder   | 0.701              |
| 5                                               | 8           | GFRKYTAF     | HLA-C*06:02 | 0.407                       | 611           | 1.0    | Weak binder   | 0.853              |
| 7                                               | 8           | RKYTAFTI     | HLA-C*06:02 | 0.357                       | 1046          | 2.0    | Weak binder   | 0.853              |
| 6                                               | 9           | FRKYTAFTI    | HLA-C*06:02 | 0.346                       | 1187          | 2.0    | Weak binder   | 0.853              |
| 5                                               | 10          | GFRKYTAFTI   | HLA-C*06:02 | 0.299                       | 1977          | 4.0    | Non-binder    | 0.853              |
| <b>Peptide Sequence: KNPEIVIQYMDDLIVV HC093</b> |             |              |             |                             |               |        |               |                    |
| 6                                               | 10          | VIYQYMDDLIVV | HLA-A*03:01 | 0.36                        | 1021          | 3.0    | Non-binder    | 0.853              |
| 5                                               | 11          | IVIQYMDDLIVV | HLA-A*03:01 | 0.264                       | 2887          | 4.0    | Non-binder    | 0.853              |
| 5                                               | 11          | IVIQYMDDLIVV | HLA-A*30:04 | 0.49                        | 250           | 0.4    | Strong binder | 0.753              |
| 8                                               | 8           | YQYMDDLIVV   | HLA-A*30:04 | 0.473                       | 300           | 0.5    | Strong binder | 0.753              |
| 7                                               | 9           | IYQYMDDLIVV  | HLA-A*30:04 | 0.455                       | 365           | 0.8    | Weak binder   | 0.753              |
| 6                                               | 10          | VIYQYMDDLIVV | HLA-A*30:04 | 0.407                       | 609           | 1.5    | Weak binder   | 0.753              |
| 1                                               | 10          | KNPEIVIQY    | HLA-A*30:04 | 0.373                       | 885           | 2.0    | Weak binder   | 0.753              |
| 2                                               | 9           | NPEIVIQY     | HLA-B*35:01 | 0.772                       | 12            | 0.1    | Strong binder | 0.853              |
| 2                                               | 10          | NPEIVIQYM    | HLA-B*35:01 | 0.51                        | 200           | 1.5    | Weak binder   | 0.853              |
| 8                                               | 8           | YQYMDDLIVV   | HLA-B*35:01 | 0.494                       | 238           | 1.5    | Weak binder   | 0.853              |
| 5                                               | 11          | IVIQYMDDLIVV | HLA-B*35:01 | 0.405                       | 627           | 3.0    | Non-binder    | 0.853              |
| 8                                               | 8           | YQYMDDLIVV   | HLA-B*50:01 | 0.447                       | 395           | 1.5    | Weak binder   | 0.701              |
| 8                                               | 9           | YQYMDDLIVV   | HLA-B*50:01 | 0.36                        | 1023          | 2.0    | Weak binder   | 0.701              |
| 9                                               | 8           | QYMDDLIVV    | HLA-C*04:01 | 0.193                       | NA            | 0.5    | Strong binder | 0.762              |
| 7                                               | 10          | IYQYMDDLIVV  | HLA-C*04:01 | 0.189                       | NA            | 0.5    | Strong binder | 0.762              |
| 7                                               | 9           | IYQYMDDLIVV  | HLA-C*04:01 | 0.115                       | NA            | 2.0    | Weak binder   | 0.762              |

| Pos | Length (aa) | Peptide    | HLA         | 1-log <sub>50</sub> k (aff) | Affinity (nM) | % Rank | Label       | Estimated Accuracy |
|-----|-------------|------------|-------------|-----------------------------|---------------|--------|-------------|--------------------|
| 1   | 11          | KNPEIVIQYM | HLA-C*04:01 | 0.112                       | NA            | 2.0    | Weak binder | 0.762              |
| 7   | 8           | IYQYMDDL   | HLA-C*04:01 | 0.109                       | NA            | 3.0    | Non-binder  | 0.762              |
| 8   | 9           | YQYMDDLIV  | HLA-C*04:01 | 0.083                       | NA            | 4.0    | Non-binder  | 0.762              |
|     |             |            |             |                             |               |        |             |                    |
| 8   | 9           | YQYMDDLIV  | HLA-C*06:02 | 0.374                       | 874           | 1.5    | Weak binder | 0.853              |
| 9   | 8           | QYMDDLIV   | HLA-C*06:02 | 0.325                       | 1483          | 3.0    | Non-binder  | 0.853              |
| 8   | 8           | YQYMDDLY   | HLA-C*06:02 | 0.309                       | 1757          | 3.0    | Non-binder  | 0.853              |
| 1   | 11          | KNPEIVIQYM | HLA-C*06:02 | 0.287                       | 2239          | 4.0    | Non-binder  | 0.853              |

**Volunteer ID: 418**

**HLA-A\*02:01, HLA-A\*24:02, HLA-B\*07:02, HLA-B\*27:05, HLA-C\*01:02, HLA-C\*07:02**

| Pos                                            | Length (aa) | Peptide     | HLA         | 1-log <sub>50</sub> k (aff) | Affinity (nM) | % Rank | Label           | Estimated Accuracy |
|------------------------------------------------|-------------|-------------|-------------|-----------------------------|---------------|--------|-----------------|--------------------|
| <b>Peptide Sequence: EVIPMFTALSEGATP HC003</b> |             |             |             |                             |               |        |                 |                    |
| 3                                              | 11          | IPMFTALSEGA | HLA-B*07:02 | 0.44                        | 430           | 1.5    | Weak binder     | 0.853              |
| 3                                              | 10          | IPMFTALSEG  | HLA-B*07:02 | 0.343                       | 1229          | 3.0    | Non-binder      | 0.853              |
| 1                                              | 9           | EVIPMFTAL   | HLA-B*07:02 | 0.33                        | 1402          | 3.0    | Non-binder      | 0.853              |
| 3                                              | 9           | IPMFTALSE   | HLA-B*07:02 | 0.327                       | 1446          | 3.0    | Non-binder      | 0.853              |
| 3                                              | 8           | IPMFTALS    | HLA-B*07:02 | 0.264                       | 2888          | 4.0    | Non-binder      | 0.853              |
|                                                |             |             |             |                             |               |        |                 |                    |
| 2                                              | 8           | VIPMFTAL    | HLA-C*01:02 | 0.491                       | 247           | 0.12   | Strong binder   | 0.698              |
|                                                |             |             |             |                             |               |        |                 |                    |
| 2                                              | 8           | VIPMFTAL    | HLA-C*07:02 | 0.17                        | NA            | 3.0    | Non-binder      | 0.541              |
| 1                                              | 9           | EVIPMFTAL   | HLA-C*07:02 | 0.158                       | NA            | 3.0    | Non-binder      | 0.541              |
| <b>Peptide Sequence: GLNKIVRMYSVPSIL HC017</b> |             |             |             |                             |               |        |                 |                    |
| 7                                              | 8           | RMYSVPSI    | HLA-A*02:01 | 0.622                       | 60            | 1.5    | Weak binder     | 0.853              |
| 7                                              | 9           | RMYSVPSIL   | HLA-A*02:01 | 0.555                       | 124           | 3.0    | Combined binder | 0.853              |
| 4                                              | 9           | KIVRMYSVP   | HLA-A*02:01 | 0.546                       | 136           | 3.0    | Combined binder | 0.853              |
| 4                                              | 11          | KIVRMYSVPSI | HLA-A*02:01 | 0.378                       | 838           | 5.0    | Non-binder      | 0.853              |
|                                                |             |             |             |                             |               |        |                 |                    |
| 8                                              | 8           | MYSVPSIL    | HLA-A*24:02 | 0.694                       | 27            | 0.25   | Strong binder   | 0.853              |
| 7                                              | 8           | RMYSVPSI    | HLA-A*24:02 | 0.393                       | 708           | 3.0    | Non-binder      | 0.853              |
| 7                                              | 9           | RMYSVPSIL   | HLA-A*24:02 | 0.292                       | 2124          | 4.0    | Non-binder      | 0.853              |
|                                                |             |             |             |                             |               |        |                 |                    |
| 5                                              | 11          | IVRMYSVPSIL | HLA-B*07:02 | 0.539                       | 147           | 0.8    | Weak binder     | 0.853              |
| 5                                              | 10          | IVRMYSVPSI  | HLA-B*07:02 | 0.475                       | 294           | 1.5    | Weak binder     | 0.853              |
| 5                                              | 8           | IVRMYSVP    | HLA-B*07:02 | 0.423                       | 512           | 1.5    | Weak binder     | 0.853              |
| 7                                              | 9           | RMYSVPSIL   | HLA-B*07:02 | 0.4                         | 661           | 2.0    | Weak binder     | 0.853              |
| 7                                              | 8           | RMYSVPSI    | HLA-B*07:02 | 0.327                       | 1452          | 3.0    | Non-binder      | 0.853              |
|                                                |             |             |             |                             |               |        |                 |                    |
| 6                                              | 10          | VRMYSVPSIL  | HLA-B*27:05 | 0.571                       | 103           | 0.8    | Weak binder     | 0.853              |
| 6                                              | 9           | VRMYSVPSI   | HLA-B*27:05 | 0.558                       | 119           | 0.8    | Weak binder     | 0.853              |
| 7                                              | 8           | RMYSVPSI    | HLA-B*27:05 | 0.386                       | 771           | 3.0    | Non-binder      | 0.853              |
| 7                                              | 9           | RMYSVPSIL   | HLA-B*27:05 | 0.377                       | 844           | 3.0    | Non-binder      | 0.853              |
| 6                                              | 8           | VRMYSVPS    | HLA-B*27:05 | 0.368                       | 932           | 3.0    | Non-binder      | 0.853              |
|                                                |             |             |             |                             |               |        |                 |                    |
| 7                                              | 9           | RMYSVPSIL   | HLA-C*01:02 | 0.529                       | 163           | 0.08   | Strong binder   | 0.698              |
| 7                                              | 8           | RMYSVPSI    | HLA-C*01:02 | 0.463                       | 335           | 0.25   | Strong binder   | 0.698              |
| 8                                              | 8           | MYSVPSIL    | HLA-C*01:02 | 0.333                       | 1369          | 2.0    | Weak binder     | 0.698              |
| 5                                              | 11          | IVRMYSVPSIL | HLA-C*01:02 | 0.316                       | 1633          | 2.0    | Weak binder     | 0.698              |
| 5                                              | 10          | IVRMYSVPSI  | HLA-C*01:02 | 0.277                       | 2493          | 4.0    | Non-binder      | 0.698              |
| 5                                              | 8           | IVRMYSVP    | HLA-C*01:02 | 0.254                       | 3190          | 4.0    | Non-binder      | 0.698              |
|                                                |             |             |             |                             |               |        |                 |                    |
| 7                                              | 9           | RMYSVPSIL   | HLA-C*07:02 | 0.322                       | NA            | 0.17   | Strong binder   | 0.541              |

| Pos                                             | Length (aa) | Peptide     | HLA         | 1-log50k (aff) | Affinity (nM) | % Rank | Label           | Estimated Accuracy |
|-------------------------------------------------|-------------|-------------|-------------|----------------|---------------|--------|-----------------|--------------------|
| 7                                               | 8           | RMYSVPSI    | HLA-C*07:02 | 0.276          | NA            | 0.4    | Strong binder   | 0.541              |
| 8                                               | 8           | MYSVPSIL    | HLA-C*07:02 | 0.255          | NA            | 0.8    | Weak binder     | 0.541              |
| 6                                               | 10          | VRMYSVPSIL  | HLA-C*07:02 | 0.151          | NA            | 4.0    | Non-binder      | 0.541              |
| <b>Peptide Sequence: KNFPISPIETVPVKLK HC049</b> |             |             |             |                |               |        |                 |                    |
| 5                                               | 11          | ISPIETVPVKL | HLA-A*24:02 | 0.311          | 1723          | 4.0    | Non-binder      | 0.853              |
| 2                                               | 10          | NFPISPIETV  | HLA-A*24:02 | 0.307          | 1812          | 4.0    | Non-binder      | 0.853              |
| 6                                               | 8           | SPIETVPV    | HLA-B*07:02 | 0.583          | 91            | 0.8    | Weak binder     | 0.853              |
| 3                                               | 11          | FPISPIETVPV | HLA-B*07:02 | 0.555          | 124           | 0.8    | Weak binder     | 0.853              |
| 6                                               | 10          | SPIETVPVKL  | HLA-B*07:02 | 0.542          | 142           | 0.8    | Weak binder     | 0.853              |
| 3                                               | 9           | FPISPIETV   | HLA-B*07:02 | 0.414          | 565           | 1.5    | Weak binder     | 0.853              |
| 3                                               | 8           | FPISPIET    | HLA-B*07:02 | 0.311          | 1736          | 3.0    | Non-binder      | 0.853              |
| 5                                               | 9           | ISPIETVPV   | HLA-C*01:02 | 0.403          | 638           | 0.8    | Weak binder     | 0.698              |
| 5                                               | 11          | ISPIETVPVKL | HLA-C*01:02 | 0.349          | 1143          | 1.5    | Weak binder     | 0.698              |
| 3                                               | 11          | FPISPIETVPV | HLA-C*07:02 | 0.225          | NA            | 1.0    | Weak binder     | 0.541              |
| 5                                               | 9           | ISPIETVPV   | HLA-C*07:02 | 0.164          | NA            | 3.0    | Non-binder      | 0.541              |
| 6                                               | 8           | SPIETVPV    | HLA-C*07:02 | 0.147          | NA            | 4.0    | Non-binder      | 0.541              |
| <b>Peptide Sequence: NPEIVYQYMDDLIV HC093</b>   |             |             |             |                |               |        |                 |                    |
| 7                                               | 9           | YQYMDDLIV   | HLA-A*02:01 | 0.788          | 10            | 0.4    | Strong binder   | 0.853              |
| 5                                               | 11          | VYQYMDDLIV  | HLA-A*02:01 | 0.682          | 31            | 1.0    | Weak binder     | 0.853              |
| 6                                               | 10          | IYQYMDDLIV  | HLA-A*24:02 | 0.565          | 110           | 0.8    | Weak binder     | 0.853              |
| 6                                               | 8           | IYQYMDDL    | HLA-A*24:02 | 0.537          | 150           | 1.0    | Weak binder     | 0.853              |
| 6                                               | 9           | IYQYMDDLIV  | HLA-A*24:02 | 0.51           | 201           | 1.0    | Weak binder     | 0.853              |
| 8                                               | 8           | QYMDDLIV    | HLA-A*24:02 | 0.507          | 207           | 1.5    | Weak binder     | 0.853              |
| 1                                               | 10          | NPEIVYQYM   | HLA-B*07:02 | 0.27           | 2690          | 4.0    | Non-binder      | 0.853              |
| 7                                               | 8           | YQYMDDLIV   | HLA-B*27:05 | 0.295          | 2062          | 4.0    | Non-binder      | 0.853              |
| 7                                               | 9           | YQYMDDLIV   | HLA-C*07:02 | 0.197          | NA            | 1.5    | Weak binder     | 0.541              |
| 8                                               | 8           | QYMDDLIV    | HLA-C*07:02 | 0.169          | NA            | 3.0    | Non-binder      | 0.541              |
| <b>Peptide Sequence: VIYQYMDDLIVGSDL HC094</b>  |             |             |             |                |               |        |                 |                    |
| 3                                               | 9           | YQYMDDLIV   | HLA-A*02:01 | 0.788          | 10            | 0.4    | Strong binder   | 0.853              |
| 5                                               | 11          | YMDDLIVGSDL | HLA-A*02:01 | 0.766          | 13            | 0.5    | Strong binder   | 0.853              |
| 1                                               | 11          | VYQYMDDLIV  | HLA-A*02:01 | 0.682          | 31            | 1.0    | Weak binder     | 0.853              |
| 5                                               | 9           | YMDDLIVGS   | HLA-A*02:01 | 0.653          | 43            | 1.5    | Weak binder     | 0.853              |
| 5                                               | 8           | YMDDLIVG    | HLA-A*02:01 | 0.531          | 159           | 3.0    | Combined binder | 0.853              |
| 2                                               | 10          | IYQYMDDLIV  | HLA-A*24:02 | 0.565          | 110           | 0.8    | Weak binder     | 0.853              |
| 2                                               | 8           | IYQYMDDL    | HLA-A*24:02 | 0.537          | 150           | 1.0    | Weak binder     | 0.853              |
| 2                                               | 9           | IYQYMDDLIV  | HLA-A*24:02 | 0.51           | 201           | 1.0    | Weak binder     | 0.853              |
| 4                                               | 8           | QYMDDLIV    | HLA-A*24:02 | 0.507          | 207           | 1.5    | Weak binder     | 0.853              |
| 2                                               | 11          | IYQYMDDLIVG | HLA-A*24:02 | 0.307          | 1798          | 4.0    | Non-binder      | 0.853              |
| 4                                               | 9           | QYMDDLIVG   | HLA-A*24:02 | 0.275          | 2545          | 4.0    | Non-binder      | 0.853              |
| 3                                               | 8           | YQYMDDLIV   | HLA-B*27:05 | 0.295          | 2062          | 4.0    | Non-binder      | 0.853              |
| 5                                               | 11          | YMDDLIVGSDL | HLA-C*01:02 | 0.422          | 520           | 0.5    | Strong binder   | 0.698              |
| 5                                               | 11          | YMDDLIVGSDL | HLA-C*07:02 | 0.206          | NA            | 1.5    | Weak binder     | 0.541              |
| 3                                               | 9           | YQYMDDLIV   | HLA-C*07:02 | 0.197          | NA            | 1.5    | Weak binder     | 0.541              |
| 4                                               | 8           | QYMDDLIV    | HLA-C*07:02 | 0.169          | NA            | 3.0    | Non-binder      | 0.541              |

Volunteer ID: 420

HLA-A\*02:01, HLA-A\*29:02, HLA-B\*44:03, HLA-B\*55:01, HLA-C\*03:03, HLA-C\*16:01

| Pos                                            | Length (aa) | Peptide     | HLA         | 1-log50k (aff) | Affinity (nM) | % Rank | Label           | Estimated Accuracy |
|------------------------------------------------|-------------|-------------|-------------|----------------|---------------|--------|-----------------|--------------------|
| <b>Peptide Sequence: KNPEIVIQYMDDLIV HC093</b> |             |             |             |                |               |        |                 |                    |
| 8                                              | 9           | YQYMDDLIV   | HLA-A*02:01 | 0.788          | 10            | 0.4    | Strong binder   | 0.853              |
| 6                                              | 11          | VIYQYMDDLIV | HLA-A*02:01 | 0.682          | 31            | 1.0    | Weak binder     | 0.853              |
| 8                                              | 8           | YQYMDDLIV   | HLA-A*29:02 | 0.748          | 15            | 0.2    | Strong binder   | 0.853              |
| 6                                              | 10          | VIYQYMDDLIV | HLA-A*29:02 | 0.739          | 17            | 0.2    | Strong binder   | 0.853              |
| 5                                              | 11          | IVIQYMDDLIV | HLA-A*29:02 | 0.728          | 19            | 0.25   | Strong binder   | 0.853              |
| 7                                              | 9           | IYQYMDDLIV  | HLA-A*29:02 | 0.6            | 76            | 0.8    | Weak binder     | 0.853              |
| 1                                              | 10          | KNPEIVIQY   | HLA-A*29:02 | 0.357          | 1048          | 3.0    | Non-binder      | 0.853              |
| 3                                              | 8           | PEIVIQY     | HLA-B*44:03 | 0.492          | 244           | 0.8    | Weak binder     | 0.853              |
| 3                                              | 9           | PEIVIQYM    | HLA-B*44:03 | 0.351          | 1119          | 2.0    | Weak binder     | 0.853              |
| 8                                              | 8           | YQYMDDLIV   | HLA-B*44:03 | 0.316          | 1637          | 2.0    | Weak binder     | 0.853              |
| 8                                              | 9           | YQYMDDLIV   | HLA-C*03:03 | 0.484          | 266           | 4.0    | Combined binder | 0.694              |
| 6                                              | 11          | VIYQYMDDLIV | HLA-C*03:03 | 0.395          | 697           | 7.0    | Non-binder      | 0.694              |
| 8                                              | 9           | YQYMDDLIV   | HLA-C*16:01 | 0.531          | 160           | 4.0    | Combined binder | 0.734              |
| 8                                              | 8           | YQYMDDLIV   | HLA-C*16:01 | 0.482          | 271           | 6.0    | Combined binder | 0.734              |
| 6                                              | 11          | VIYQYMDDLIV | HLA-C*16:01 | 0.48           | 278           | 6.0    | Combined binder | 0.734              |
| 9                                              | 8           | QYMDDLIV    | HLA-C*16:01 | 0.452          | 378           | 7.0    | Combined binder | 0.734              |
| 6                                              | 9           | VIYQYMDL    | HLA-C*16:01 | 0.448          | 391           | 7.0    | Combined binder | 0.734              |
| 6                                              | 10          | VIYQYMDDLIV | HLA-C*16:01 | 0.412          | 580           | 9.0    | Non-binder      | 0.734              |
| 1                                              | 11          | KNPEIVIQYM  | HLA-C*16:01 | 0.402          | 645           | 9.0    | Non-binder      | 0.734              |
| 7                                              | 10          | IYQYMDDLIV  | HLA-C*16:01 | 0.386          | 772           | 10.0   | Non-binder      | 0.734              |
| <b>Peptide Sequence: VIYQYMDDLIVGSDL HC094</b> |             |             |             |                |               |        |                 |                    |
| 3                                              | 9           | YQYMDDLIV   | HLA-A*02:01 | 0.788          | 10            | 0.4    | Strong binder   | 0.853              |
| 5                                              | 11          | YMDDLIVGSDL | HLA-A*02:01 | 0.766          | 13            | 0.5    | Strong binder   | 0.853              |
| 1                                              | 11          | VIYQYMDDLIV | HLA-A*02:01 | 0.682          | 31            | 1.0    | Weak binder     | 0.853              |
| 5                                              | 9           | YMDDLIVGS   | HLA-A*02:01 | 0.653          | 43            | 1.5    | Weak binder     | 0.853              |
| 5                                              | 8           | YMDDLIVG    | HLA-A*02:01 | 0.531          | 159           | 3.0    | Combined binder | 0.853              |
| 3                                              | 8           | YQYMDDLIV   | HLA-A*29:02 | 0.748          | 15            | 0.2    | Strong binder   | 0.853              |
| 1                                              | 10          | VIYQYMDDLIV | HLA-A*29:02 | 0.739          | 17            | 0.2    | Strong binder   | 0.853              |
| 2                                              | 9           | IYQYMDDLIV  | HLA-A*29:02 | 0.6            | 76            | 0.8    | Weak binder     | 0.853              |
| 3                                              | 8           | YQYMDDLIV   | HLA-B*44:03 | 0.316          | 1637          | 2.0    | Weak binder     | 0.853              |
| 5                                              | 11          | YMDDLIVGSDL | HLA-C*03:03 | 0.695          | 27            | 0.1    | Strong binder   | 0.694              |
| 3                                              | 9           | YQYMDDLIV   | HLA-C*03:03 | 0.484          | 266           | 4.0    | Combined binder | 0.694              |
| 1                                              | 11          | VIYQYMDDLIV | HLA-C*03:03 | 0.395          | 697           | 7.0    | Non-binder      | 0.694              |
| 5                                              | 11          | YMDDLIVGSDL | HLA-C*16:01 | 0.691          | 28            | 0.5    | Strong binder   | 0.734              |
| 3                                              | 9           | YQYMDDLIV   | HLA-C*16:01 | 0.531          | 160           | 4.0    | Combined binder | 0.734              |
| 3                                              | 8           | YQYMDDLIV   | HLA-C*16:01 | 0.482          | 271           | 6.0    | Combined binder | 0.734              |
| 1                                              | 11          | VIYQYMDDLIV | HLA-C*16:01 | 0.48           | 278           | 6.0    | Combined binder | 0.734              |
| 4                                              | 8           | QYMDDLIV    | HLA-C*16:01 | 0.452          | 378           | 7.0    | Combined binder | 0.734              |
| 1                                              | 9           | VIYQYMDL    | HLA-C*16:01 | 0.448          | 391           | 7.0    | Combined binder | 0.734              |
| 5                                              | 8           | YMDDLIVG    | HLA-C*16:01 | 0.421          | 525           | 8.0    | Non-binder      | 0.734              |
| 1                                              | 10          | VIYQYMDDLIV | HLA-C*16:01 | 0.412          | 580           | 9.0    | Non-binder      | 0.734              |
| 2                                              | 10          | IYQYMDDLIV  | HLA-C*16:01 | 0.386          | 772           | 10.0   | Non-binder      | 0.734              |

| Pos                                             | Length (aa) | Peptide     | HLA         | 1-log50k (aff) | Affinity (nM) | % Rank | Label           | Estimated Accuracy |
|-------------------------------------------------|-------------|-------------|-------------|----------------|---------------|--------|-----------------|--------------------|
| <b>Peptide Sequence: VQMAVFIHNFKRKGGI HC164</b> |             |             |             |                |               |        |                 |                    |
| 2                                               | 9           | QMAVFIHNF   | HLA-A*29:02 | 0.479          | 280           | 1.5    | Weak binder     | 0.853              |
| 1                                               | 10          | VQMAVFIHNF  | HLA-A*29:02 | 0.396          | 685           | 3.0    | Non-binder      | 0.853              |
| 3                                               | 9           | MAVFIHNFK   | HLA-A*29:02 | 0.378          | 836           | 3.0    | Non-binder      | 0.853              |
| 3                                               | 10          | MAVFIHNFKR  | HLA-A*29:02 | 0.375          | 862           | 3.0    | Non-binder      | 0.853              |
| 3                                               | 8           | MAVFIHNF    | HLA-A*29:02 | 0.333          | 1368          | 4.0    | Non-binder      | 0.853              |
| 2                                               | 10          | QMAVFIHNFK  | HLA-A*29:02 | 0.321          | 1559          | 4.0    | Non-binder      | 0.853              |
| 2                                               | 11          | QMAVFIHNFKR | HLA-A*29:02 | 0.313          | 1693          | 4.0    | Non-binder      | 0.853              |
| 1                                               | 11          | VQMAVFIHNFK | HLA-A*29:02 | 0.312          | 1715          | 4.0    | Non-binder      | 0.853              |
| 5                                               | 8           | VFIHNFKR    | HLA-A*29:02 | 0.291          | 2139          | 4.0    | Non-binder      | 0.853              |
| 1                                               | 10          | VQMAVFIHNF  | HLA-B*44:03 | 0.38           | 820           | 1.5    | Weak binder     | 0.853              |
| 3                                               | 8           | MAVFIHNF    | HLA-B*51:01 | 0.24           | NA            | 2.0    | Weak binder     | 0.853              |
| 3                                               | 8           | MAVFIHNF    | HLA-C*03:03 | 0.412          | 580           | 6.0    | Non-binder      | 0.694              |
| 1                                               | 10          | VQMAVFIHNF  | HLA-C*03:03 | 0.373          | 880           | 8.0    | Non-binder      | 0.694              |
| 1                                               | 10          | VQMAVFIHNF  | HLA-C*16:01 | 0.598          | 77            | 2.0    | Weak binder     | 0.734              |
| 3                                               | 8           | MAVFIHNF    | HLA-C*16:01 | 0.572          | 103           | 3.0    | Combined binder | 0.734              |
| 2                                               | 9           | QMAVFIHNF   | HLA-C*16:01 | 0.544          | 139           | 3.0    | Combined binder | 0.734              |

**Volunteer ID: 421**

**HLA-A\*02:01, HLA-A\*11:01, HLA-B\*35:03, HLA-B\*40:02, HLA-C\*02:02, HLA-C\*12:03**

| Pos                                            | Length (aa) | Peptide     | HLA         | 1-log50k (aff) | Affinity (nM) | % Rank | Label           | Estimated Accuracy |
|------------------------------------------------|-------------|-------------|-------------|----------------|---------------|--------|-----------------|--------------------|
| <b>Peptide Sequence: CTERQANFLGKIWPS HC031</b> |             |             |             |                |               |        |                 |                    |
| 8                                              | 8           | FLGKIWPS    | HLA-A*02:01 | 0.558          | 120           | 3.0    | Combined binder | 0.853              |
| 4                                              | 8           | RQANFLGK    | HLA-A*11:01 | 0.656          | 41            | 0.8    | Weak binder     | 0.853              |
| 1                                              | 11          | CTERQANFLGK | HLA-A*11:01 | 0.629          | 55            | 0.8    | Weak binder     | 0.853              |
| 2                                              | 8           | TERQANFL    | HLA-B*40:02 | 0.551          | 129           | 1.5    | Weak binder     | 0.853              |
| 2                                              | 11          | TERQANFLGKI | HLA-B*40:02 | 0.499          | 226           | 2.0    | Weak binder     | 0.853              |
| 4                                              | 9           | RQANFLGKI   | HLA-B*40:02 | 0.499          | 227           | 2.0    | Weak binder     | 0.853              |
| 4                                              | 10          | RQANFLGKIW  | HLA-B*40:02 | 0.41           | 590           | 4.0    | Non-binder      | 0.853              |
| 4                                              | 9           | RQANFLGKI   | HLA-C*02:02 | 0.379          | 826           | 7.0    | Non-binder      | 0.706              |
| 1                                              | 8           | CTERQANF    | HLA-C*02:02 | 0.366          | 951           | 7.0    | Non-binder      | 0.706              |
| 1                                              | 9           | CTERQANFL   | HLA-C*02:02 | 0.363          | 983           | 8.0    | Non-binder      | 0.706              |
| 4                                              | 9           | RQANFLGKI   | HLA-C*12:03 | 0.411          | 585           | 9.0    | Non-binder      | 0.730              |
| <b>Peptide Sequence: YFSVPLDEGFRKYTA HC078</b> |             |             |             |                |               |        |                 |                    |
| 2                                              | 11          | FSVPLDEGFRK | HLA-A*11:01 | 0.512          | 196           | 2.0    | Weak binder     | 0.853              |
| 3                                              | 10          | SVPLDEGFRK  | HLA-A*11:01 | 0.493          | 242           | 3.0    | Combined binder | 0.853              |
| 4                                              | 10          | VPLDEGFRKY  | HLA-B*35:03 | 0.173          | NA            | 2.0    | Weak binder     | 0.811              |
| 2                                              | 9           | FSVPLDEGF   | HLA-C*02:02 | 0.569          | 106           | 0.8    | Weak binder     | 0.706              |
| 2                                              | 9           | FSVPLDEGF   | HLA-C*12:03 | 0.481          | 274           | 6.0    | Combined binder | 0.730              |
| 1                                              | 10          | YFSVPLDEGF  | HLA-C*12:03 | 0.366          | 953           | 15.0   | Non-binder      | 0.730              |
| <b>Peptide Sequence: GSPAIFQSSMTKILE HC088</b> |             |             |             |                |               |        |                 |                    |
| 6                                              | 8           | FQSSMTKI    | HLA-A*02:01 | 0.443          | 412           | 4.0    | Combined binder | 0.853              |

| Pos                                            | Length (aa) | Peptide     | HLA         | 1-log50k (aff) | Affinity (nM) | % Rank | Label           | Estimated Accuracy |
|------------------------------------------------|-------------|-------------|-------------|----------------|---------------|--------|-----------------|--------------------|
| 4                                              | 10          | AIFQSSMTKI  | HLA-A*02:01 | 0.398          | 671           | 5.0    | Non-binder      | 0.853              |
| 4                                              | 9           | AIFQSSMTK   | HLA-A*11:01 | 0.813          | 8             | 0.05   | Strong binder   | 0.853              |
| 5                                              | 8           | IFQSSMTK    | HLA-A*11:01 | 0.47           | 309           | 3.0    | Combined binder | 0.853              |
| 3                                              | 10          | PAIFQSSMTK  | HLA-A*11:01 | 0.395          | 698           | 4.0    | Non-binder      | 0.853              |
| 2                                              | 9           | SPAIFQSSM   | HLA-B*35:03 | 0.378          | NA            | 0.2    | Strong binder   | 0.811              |
| 2                                              | 8           | SPAIFQSS    | HLA-B*35:03 | 0.156          | NA            | 3.0    | Non-binder      | 0.811              |
| 2                                              | 10          | SPAIFQSSMT  | HLA-B*35:03 | 0.119          | NA            | 4.0    | Non-binder      | 0.811              |
| 6                                              | 9           | FQSSMTKIL   | HLA-B*40:02 | 0.371          | 899           | 4.0    | Non-binder      | 0.853              |
| 1                                              | 10          | GSPAIFQSSM  | HLA-C*02:02 | 0.483          | 270           | 3.0    | Combined binder | 0.706              |
| 4                                              | 10          | AIFQSSMTKI  | HLA-C*02:02 | 0.426          | 500           | 4.0    | Non-binder      | 0.706              |
| 6                                              | 8           | FQSSMTKI    | HLA-C*02:02 | 0.384          | 781           | 6.0    | Non-binder      | 0.706              |
| 4                                              | 10          | AIFQSSMTKI  | HLA-C*12:03 | 0.565          | 110           | 3.0    | Combined binder | 0.730              |
| 4                                              | 11          | AIFQSSMTKIL | HLA-C*12:03 | 0.537          | 150           | 4.0    | Combined binder | 0.730              |
| 1                                              | 10          | GSPAIFQSSM  | HLA-C*12:03 | 0.523          | 175           | 4.0    | Combined binder | 0.730              |
| 6                                              | 9           | FQSSMTKIL   | HLA-C*12:03 | 0.384          | 785           | 15.0   | Non-binder      | 0.730              |
| 6                                              | 8           | FQSSMTKI    | HLA-C*12:03 | 0.38           | 817           | 15.0   | Non-binder      | 0.730              |
| <b>Peptide Sequence: KNPEIVIQYMDDLIV HC093</b> |             |             |             |                |               |        |                 |                    |
| 8                                              | 9           | YQYMDDLIV   | HLA-A*02:01 | 0.788          | 10            | 0.4    | Strong binder   | 0.853              |
| 6                                              | 11          | VIYQMDDLIV  | HLA-A*02:01 | 0.682          | 31            | 1.0    | Strong binder   | 0.853              |
| 10                                             | 11          | YMDDLIVSDIK | HLA-A*11:01 | 0.453          | 371           | 3.0    | Weak binder     | 0.853              |
| 15                                             | 10          | YVSDIKVVPR  | HLA-A*11:01 | 0.44           | 429           | 3.0    | Weak binder     | 0.853              |
| 6                                              | 10          | VIYQMDDLIV  | HLA-A*11:01 | 0.429          | 482           | 3.0    | Weak binder     | 0.853              |
| 5                                              | 11          | IVYQMDDLIV  | HLA-A*11:01 | 0.419          | 539           | 3.0    | Non-binder      | 0.853              |
| 8                                              | 9           | YQYMDDLIV   | HLA-B*40:02 | 0.438          | 436           | 3.0    | Weak binder     | 0.853              |
| 3                                              | 9           | PEIVYQYM    | HLA-B*40:02 | 0.369          | 926           | 5.0    | Non-binder      | 0.853              |
| 8                                              | 8           | YQYMDDLIV   | HLA-C*02:02 | 0.57           | 105           | 0.8    | Weak binder     | 0.706              |
| 8                                              | 9           | YQYMDDLIV   | HLA-C*02:02 | 0.467          | 321           | 3.0    | Weak binder     | 0.706              |
| 6                                              | 10          | VIYQMDDLIV  | HLA-C*02:02 | 0.425          | 502           | 4.0    | Non-binder      | 0.706              |
| 6                                              | 11          | VIYQMDDLIV  | HLA-C*02:02 | 0.415          | 559           | 5.0    | Non-binder      | 0.706              |
| 8                                              | 9           | YQYMDDLIV   | HLA-C*12:03 | 0.568          | 108           | 3.0    | Weak binder     | 0.730              |
| 6                                              | 11          | VIYQMDDLIV  | HLA-C*12:03 | 0.511          | 199           | 5.0    | Weak binder     | 0.730              |
| 6                                              | 9           | VIYQMDDL    | HLA-C*12:03 | 0.48           | 279           | 6.0    | Weak binder     | 0.730              |
| 8                                              | 8           | YQYMDDLIV   | HLA-C*12:03 | 0.473          | 298           | 6.0    | Weak binder     | 0.730              |
| 9                                              | 8           | QYMDDLIV    | HLA-C*12:03 | 0.424          | 509           | 9.0    | Non-binder      | 0.730              |
| 6                                              | 10          | VIYQMDDLIV  | HLA-C*12:03 | 0.411          | 585           | 9.0    | Non-binder      | 0.730              |
| <b>Peptide Sequence: SDIKVPPRRKAKIIR HC175</b> |             |             |             |                |               |        |                 |                    |
| 4                                              | 9           | KVPPRRKAK   | HLA-A*11:01 | 0.462          | 338           | 3.0    | Weak binder     | 0.853              |

a – Prediction were performed using HLArestrictor with NetMHCpan version 2.4

b - Peptide lengths: **8, 9, 10, 11**

c - Sort-method: OR. Sort-mode: HLA-oriented

d - %rank threshold for strong binding peptides: 0.5% rank and weak binding peptides: 2.0% rank

e - Affinity threshold for strong binding peptides: 50 nM and weak binding peptides: 500 nM

f - Number of predictions per peptide: Not specified

g - Non-binders shown up to a prediction score of 2.0 (weak binding threshold)
